# Supplementary material for: A computational investigation of the decomposition of acetic acid in H-SSZ-13 and its role in the initiation of the MTO process
Source: Royal Society of Chemistry journal article supplement (doi:10.1039/d2cy01779b), 2023-01-01
Supplement: d2cy01779b1.pdf [file d2cy01779b1.pdf]

# **Supporting information: A computational investigation of the decomposition of acetic acid in the H-SSZ-13 zeolite and its role in the initiation of the MTO process**

Philipp Huber<sup>†</sup> and Philipp N. Plessow<sup>\*, †</sup>

<sup>†</sup>Institute of Catalysis Research and Technology, Karlsruhe Institute of Technology, Hermann-von-Helmholtz Platz 1, 76344 Eggenstein-Leopoldshafen, Germany

## **Table of contents**

**S1 Additional mechanisms**

**S2 Summarized values of Gibbs free energy profiles**

**S3 Batch reactor simulation**

**S4 The (101) surface reactivity**

**S5 Total energies and frequencies**

## S1 Additional mechanisms:

Barriers for additional reaction pathways (Fig. S1) were calculated comprising hydration reactions of acetylketene and the formation of diketene.

Acetylketene (C3) can be protonated yielding D5 with a barrier of 180 kJ/mol. Three pathways for the hydration of D5 have been computed. D5 can react with the zeolite forming the surface ester of 3-oxobutanoic acid. For this reaction, an insignificant DFT free energy barrier of 3 kJ/mol relative to D5 was found. Including the ab initio corrections, the transition state becomes 1 kJ/mol lower in free energy than D5. We therefore conclude that the barrier D5-D7 is insignificant. D7 is 63 kJ/mol lower in free energy than D5. D7 then is hydrated, forming C5 with a barrier of 209 kJ/mol. Further reactions of C5 including the reaction to 3-oxobutanoic acid are discussed in the main article. D5 can also be hydrated directly to C5 with a barrier of 197 kJ/mol. Another hydration reaction (TS(D5-D8)) yields a 3-oxobutanoic acid that is protonated at its acidic OH group. The DFT energy of TS(D5-D8) is by 25 kJ/mol higher than that of D8. Taking thermodynamic contributions into account, the DFT free energy of TS(D5-D8) is by 5 kJ/mol lower than that of D8. The cluster model corrected free energy of TS(D5-D8) is by 10 kJ/mol lower than that of D8. The subsequent deprotonation to 3-oxobutanoic acid has a barrier of 211 kJ/mol.

D5 can also react to a protonated diketene (D6). The DFT free energy of TS(D5-D6) is by 11 kJ/mol higher than that of D6. After adding the cluster model correction term, the free energy of TS(D5-D6) is by 16 kJ/mol lower than that of D6. D6 can be protonated yielding diketene with a barrier of 216 kJ/mol. Another pathway for the formation of diketene starts from two ketene molecules. These can couple to D1 with a barrier of 252 kJ/mol. D1 can directly react to diketene with a barrier of 208 kJ/mol. In the gas phase, a direct dimerization from C2 to D4 was computed with a higher barrier of 291 kJ/mol. D1 can also react with the zeolite to a surface ester with a barrier of 226 kJ/mol. Hydration of D2 yields an enol of 3-oxobutanoic acid with a barrier of 237 kJ/mol. The keto-enol tautomerization to D3 has a barrier of 173 kJ/mol. With a barrier of 272 kJ/mol D3 can be dehydrated to diketene.

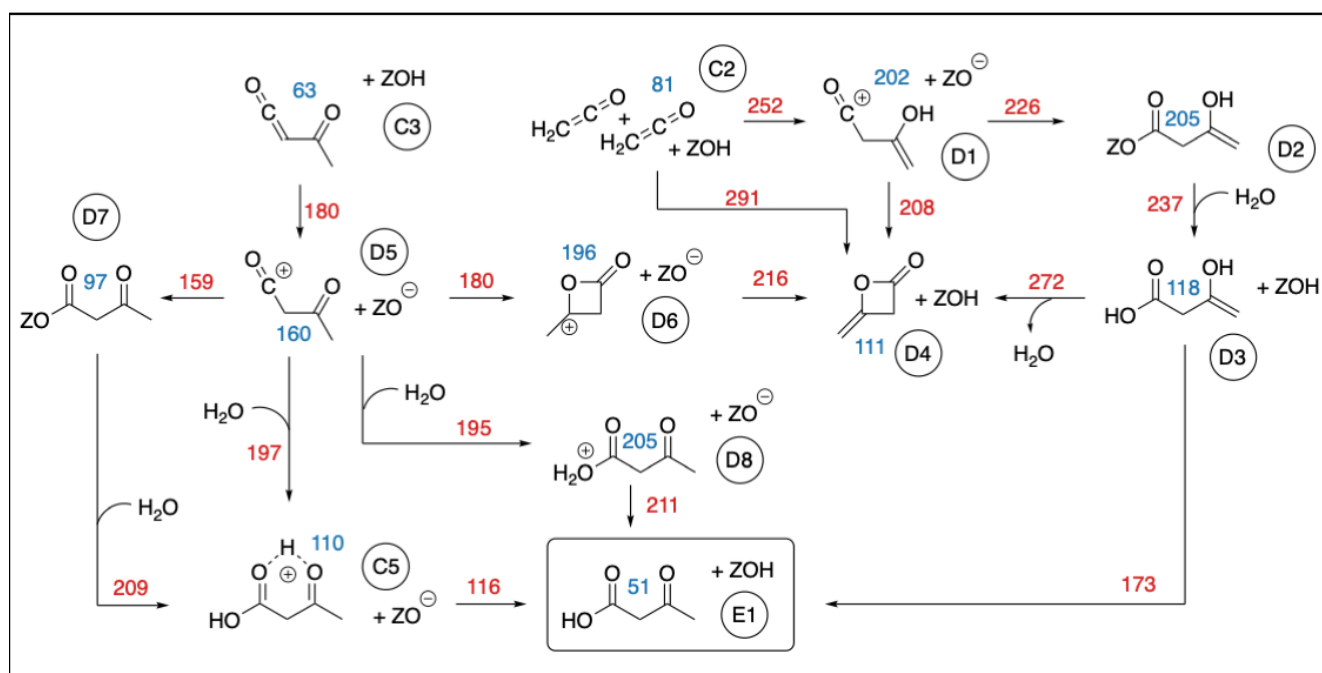

Figure S1: Additional reaction mechanisms for the hydration of acetylketene and for the formation of diketene. Gibbs free energies at 400 °C for transition states (red) and intermediates (blue) are given relative to the reference state A1 (gaseous acetic acid and the empty zeolite).

## S2 Summarized values of Gibbs free energy profiles:

Here, the values for the Gibbs free energy profiles depicted in the main article and in Figure S1 are listed.

**Table S1: Values for the states in the Gibbs free energy profiles depicted in the main article and Figure S1 in kJ/mol. DFT free energies  $\Delta G_{PBE-D3}^{PBC}$ , cluster model corrected free energies  $\Delta G$ , DFT enthalpies  $\Delta H_{PBE-D3}^{PBC}$ , and cluster model corrected enthalpies  $\Delta H$  at 400 °C are listed. If the free energy does not correspond to the adsorbed state depicted in the mechanisms, but to a gaseous state, this gaseous state is accordingly labeled in the table.**

| Fig. 5       | state                                  | $\Delta G_{PBE-D3}^{PBC}$ | $\Delta G$ | $\Delta H_{PBE-D3}^{PBC}$ | $\Delta H$ |
|--------------|----------------------------------------|---------------------------|------------|---------------------------|------------|
| A1           | ZOH + 2x AcOH(g)                       | 0                         | 0          | 0                         | 0          |
| TS(A1-A2)_O3 |                                        | 142                       | 153        | 35                        | 46         |
| A2_O3        |                                        | 57                        | 50         | 44                        | 37         |
| TS(A2-A3)    |                                        | 102                       | 99         | 80                        | 77         |
| A3           |                                        | 87                        | 91         | 84                        | 88         |
| TS(A3-C1)    |                                        | 78                        | 100        | 67                        | 89         |
| C1           | ZOH + ketene(g) + H2O(g) + AcOH(g)     | 43                        | 41         | 142                       | 140        |
| C2           |                                        | 180                       | 190        | 192                       | 202        |
| TS(C2-C3)    |                                        | 164                       | 202        | 177                       | 215        |
| C3           |                                        | 72                        | 63         | 166                       | 157        |
| TS(C3-C4)    |                                        | 143                       | 147        | 144                       | 147        |
| C4           |                                        | 33                        | 62         | -117                      | -87        |
| TS(C4-C5)    |                                        | 98                        | 139        | -60                       | -19        |
| C5           |                                        | 78                        | 110        | -65                       | -33        |
| TS(C5-E1)    |                                        | 96                        | 116        | -46                       | -26        |
| E1           |                                        | 37                        | 51         | -108                      | -94        |
| TS(A1-E1)    |                                        | 204                       | 214        | 52                        | 62         |
| Fig. 6       | state                                  | $\Delta G_{PBE-D3}^{PBC}$ | $\Delta G$ | $\Delta H_{PBE-D3}^{PBC}$ | $\Delta H$ |
| A1           | ZOH + 2x AcOH(g)                       | 0                         | 0          | 0                         | 0          |
| TS(A1-B1)    |                                        | 174                       | 183        | 58                        | 67         |
| B1           | ZOH + AcOH(g) + 1,1-dihydroxyethene(g) | 121                       | 118        | 116                       | 114        |
| TS(B1-B2)    |                                        | 187                       | 244        | -75                       | -19        |
| B2           | ZOH + 3,3-dihydroxybutanoic acid(g)    | 162                       | 143        | 35                        | 15         |
| TS(B2-B3)    |                                        | 189                       | 217        | -80                       | -52        |
| B3           |                                        | 179                       | 208        | -78                       | -49        |
| TS(B3-C5)    |                                        | 198                       | 242        | -55                       | -11        |
| C5           |                                        | 78                        | 110        | -65                       | -33        |
| TS(C5-E1)    |                                        | 96                        | 116        | -46                       | -26        |
| B4           | ZOAc + 1,1-dihydroxyethene(g)          | 170                       | 158        | 151                       | 139        |
| TS(B4-E1)    |                                        | 249                       | 259        | 111                       | 121        |
| E1           |                                        | 37                        | 51         | -108                      | -94        |
| Fig. 7       | state                                  | $\Delta G_{PBE-D3}^{PBC}$ | $\Delta G$ | $\Delta H_{PBE-D3}^{PBC}$ | $\Delta H$ |
| A1           | ZOH + 2x AcOH(g)                       | 0                         | 0          | 0                         | 0          |
| TS(A1-A2)_O3 |                                        | 137                       | 149        | 22                        | 35         |
| A2_O3        |                                        | 49                        | 40         | 35                        | 25         |
| TS(A2-C3)    |                                        | 187                       | 197        | 181                       | 192        |
| C3           |                                        | 72                        | 63         | 166                       | 157        |
| TS(C3-C4)    |                                        | 143                       | 147        | 144                       | 147        |

|                 |                                          |                           |            |                           |            |
|-----------------|------------------------------------------|---------------------------|------------|---------------------------|------------|
| C4              |                                          | 33                        | 62         | -117                      | -87        |
| TS(C4-C5)       |                                          | 98                        | 139        | -60                       | -19        |
| C5              |                                          | 78                        | 110        | -65                       | -33        |
| TS(C5-E1)       |                                          | 96                        | 116        | -46                       | -26        |
| E1              |                                          | 37                        | 51         | -108                      | -94        |
| <b>Fig. 8</b>   | <b>state</b>                             | $\Delta G_{PBE-D3}^{PBC}$ | $\Delta G$ | $\Delta H_{PBE-D3}^{PBC}$ | $\Delta H$ |
| E1              |                                          | 0                         | 0          | 0                         | 0          |
| A1              | ZOH + 2x AcOH(g)                         | -37                       | -51        | 108                       | 94         |
| TS(E1-E2)       |                                          | 72                        | 103        | 82                        | 113        |
| E2              | ZOH + propene-2-ol(g) + H2O(g) + CO2(g)  | -39                       | -66        | 188                       | 161        |
| TS(E2-E3)       |                                          | 15                        | 6          | 121                       | 112        |
| E3              | ZOH + acetone(g) + H2O(g) + CO2(g)       | -95                       | -118       | 134                       | 111        |
| <b>Fig. 10</b>  | <b>state</b>                             | $\Delta G_{PBE-D3}^{PBC}$ | $\Delta G$ | $\Delta H_{PBE-D3}^{PBC}$ | $\Delta H$ |
| E3              | ZOH + 2x acetone(g)                      | 0                         | 0          | 0                         | 0          |
| E4              | ZOH + acetone(g) + propen-2-ol(g)        | 57                        | 53         | 54                        | 50         |
| TS(E4-E5)       |                                          | 107                       | 169        | -145                      | -83        |
| E5              |                                          | 78                        | 119        | -170                      | -130       |
| TS(E5-E6)       |                                          | 132                       | 181        | -128                      | -79        |
| E6              | ZOH + (Z)-4-methylpent-2-ene-2,4-diol(g) | 143                       | 127        | 12                        | -4         |
| TS(E6-E7)       |                                          | 164                       | 183        | -96                       | -77        |
| E7              |                                          | 123                       | 154        | -148                      | -117       |
| TS(E7-E8)       |                                          | 142                       | 185        | -112                      | -69        |
| E8              |                                          | -19                       | 15         | -160                      | -126       |
| TS(E8-E9)       |                                          | 103                       | 153        | -43                       | 7          |
| E9              |                                          | 77                        | 144        | -55                       | 12         |
| TS(E9-E10)      |                                          | 110                       | 120        | -5                        | 6          |
| E9              | ZOAc + isobutene(g) + H2O(g)             | 43                        | 28         | 22                        | 7          |
| <b>Fig. S1b</b> | <b>state</b>                             | $\Delta G_{PBE-D3}^{PBC}$ | $\Delta G$ | $\Delta H_{PBE-D3}^{PBC}$ | $\Delta H$ |
| A1              | ZOH + 2x AcOH(g)                         | 0                         | 0          | 0                         | 0          |
| C3              | ZOH + Acetylketene(g) + 2x H2O(g)        | 72                        | 63         | 166                       | 157        |
| TS(C3-D5)       |                                          | 151                       | 180        | 119                       | 148        |
| D5              |                                          | 146                       | 160        | 124                       | 138        |
| TS(D5-D7)       |                                          | 148                       | 159        | 118                       | 128        |
| D7              |                                          | 114                       | 97         | 79                        | 62         |
| TS(D7-C5)       |                                          | 188                       | 209        | 72                        | 93         |
| C5              |                                          | 78                        | 110        | -65                       | -33        |
| TS(C5-E1)       |                                          | 96                        | 116        | -46                       | -26        |
| E1              |                                          | 37                        | 51         | -108                      | -94        |
| TS(D5-C5)       |                                          | 188                       | 197        | 68                        | 78         |
| TS(D5-D8)       |                                          | 170                       | 195        | 66                        | 92         |
| D8              |                                          | 175                       | 205        | 44                        | 75         |
| TS(D8-E1)       |                                          | 182                       | 211        | 87                        | 116        |
| <b>Fig. S1c</b> | <b>state</b>                             | $\Delta G_{PBE-D3}^{PBC}$ | $\Delta G$ | $\Delta H_{PBE-D3}^{PBC}$ | $\Delta H$ |
| A1              | ZOH + 2x AcOH(g)                         | 0                         | 0          | 0                         | 0          |

|                  |                                   |     |     |     |     |
|------------------|-----------------------------------|-----|-----|-----|-----|
| <b>C3</b>        | ZOH + Acetylketene(g) + 2x H2O(g) | 72  | 63  | 166 | 157 |
| <b>TS(C3-D5)</b> |                                   | 151 | 180 | 119 | 148 |
| <b>D5</b>        |                                   | 146 | 160 | 124 | 138 |
| <b>TS(D5-D6)</b> |                                   | 183 | 180 | 163 | 161 |
| <b>D6</b>        |                                   | 172 | 196 | 143 | 167 |
| <b>TS(D6-D4)</b> |                                   | 181 | 216 | 134 | 169 |
| <b>D4</b>        |                                   | 106 | 111 | 79  | 85  |
| <b>C2</b>        | ZOH + 2x Ketene(g) + 2x H2O(g)    | 86  | 81  | 285 | 280 |
| <b>TS(C2-D1)</b> |                                   | 215 | 252 | 210 | 247 |
| <b>D1</b>        |                                   | 192 | 202 | 167 | 177 |
| <b>TS(D1-D2)</b> |                                   | 228 | 226 | 177 | 175 |
| <b>D2</b>        |                                   | 215 | 205 | 181 | 171 |
| <b>TS(D2-D3)</b> |                                   | 231 | 237 | 108 | 114 |
| <b>D3</b>        |                                   | 108 | 118 | -34 | -24 |
| <b>TS(D3-D4)</b> |                                   | 249 | 272 | 103 | 126 |
| <b>TS(D3-E1)</b> |                                   | 131 | 173 | -14 | 29  |
| <b>TS(D1-D4)</b> |                                   | 204 | 208 | 165 | 170 |

### S3 Batch reactor simulation:

During the batch reactor simulation, turnovers are calculated for every elementary reaction for each time step. The total turnovers for a reaction can be obtained by summing over all time steps. The formation of 3-oxobutanoic acid was simulated by several pathways. The relevance of these pathways can be evaluated by comparing the total turnovers for significant elementary reactions. In Table S2, the conversions through these reactions are shown.

**Table S2: Total conversion through reaction steps used as benchmark reactions for the different pathways for the formation of 3-oxobutanoic acid.**

| Reaction | Pressure (bar) | Percentage (%) |
|----------|----------------|----------------|
| A2-C3    | 0.44           | 73.2           |
| C2-C3    | 0.15           | 25.8           |
| C2-D4    | 0.00           | 0.0            |
| C2-D3    | 0.00           | 0.0            |
| A1-E1    | 0.01           | 0.9            |
| B1-B2    | 0.00           | 0.0            |
| B4-E1    | 0.00           | 0.0            |

For the batch reactor simulations, some barriers were modified to achieve a more efficient performance. Some pathways comprising more than one elementary reaction steps were truncated to one elementary reaction taking the highest barrier of the whole pathway. Some low energy barriers regarding the reaction between surface acetate (A2) and ketene (C1) were shifted to a higher value of 80 kJ/mol. As a reference for a barrier, the previous state (adsorbed or gaseous precursor) lowest in free energy was taken. Only for DME, MeOH and H<sub>2</sub>O adsorption free energy barriers were considered explicitly.

Barriers of the MTO initiation from methanol to surface acetate and further initiation steps via carbonylation as well as methylation and cracking reactions of the hydrocarbon pool were taken from previous work [ACS Catal. 2017, 7, 11, 7987–7994; Catal. Sci. Technol., 2018, 8, 4420–4429; J. Am. Chem. Soc. 2019, 141, 14, 5908–5915]. The reaction barrier from A2 to C1 was already computed previously, but the corresponding barriers for this reaction computed in this study were taken. All barriers are listed in Table S3. The conversion of acetic acid was modeled with the reactions number 105–144. The MTO decarbonylation mechanism was modeled with reactions 1–104, 108 and the decarboxylation mechanism was modeled with the reactions 1–9, 21–144.

**Table S3: Gibbs free energy barriers in kJ/mol for elementary reaction steps used for the batch reactor model. Reactions 1–41 were taken from [ACS Catal. 2017, 7, 11, 7987–7994], reactions 42–104 were taken from [Catal. Sci. Technol., 2018, 8, 4420–4429], and reactions 105–140 were computed in this work. Some Carbon species from previous work were renamed from CX to CX-species (X = number) to avoid confusion to species labeled C from our work.**

| Number | Reaction                           | Forward barrier | Backward barrier |
|--------|------------------------------------|-----------------|------------------|
| 1      | ZOH*MeOH > ZOMe + H <sub>2</sub> O | 169             | 177              |
| 2      | MeOH + ZOMe > ZOH*DME              | 151             | 160              |
| 3      | ZOH*DME > ZOCOMe +                 | 220             | 153              |
| 4      | MF + ZOH > ZOH*MeOH + CO           | 135             | 178              |
| 5      | ZOCOMe + MeOH > DMM + ZOH          | 119             | 121              |
| 6      | DMM + ZOH > hacetal + ZOMe         | 145             | 137              |
| 7      | hacetal + ZOH > MF + ZOH           | 181             | 249              |
| 8      | CO + ZOMe > A2_O1_pos1             | 190             | 177              |
| 9      | A2_O1_pos1 + MeOH > MA + ZOH       | 97              | 150              |
| 10     | Ketene + ZOMe > ZO2CEt             | 159             | 203              |
| 11     | ZO2CEt + MeOH > MeO2CEt + ZOH      | 81              | 134              |
| 12     | ZO2CEt > Mketene + ZOH             | 80              | 82               |
| 13     | Mketene + ZOMe > ZO2CiPr           | 139             | 192              |
| 14     | ZO2CiPr + MeOH > MeO2CiPr + ZOH    | 83              | 132              |
| 15     | ZO2CiPr > ZOH + CO + C3-species    | 130             | 215              |
| 16     | ZO2CEt > ZOH + CO + C2-species     | 172             | 239              |
| 17     | ZO2CiPr > Dketene + ZOH            | 80              | 82               |
| 18     | Dketene + ZOMe > ZO2CtBu           | 136             | 117              |

|    |                                                |     |     |
|----|------------------------------------------------|-----|-----|
| 19 | ZO2CtBu + MeOH > MeO2CtBu + ZOH                | 83  | 203 |
| 20 | ZO2CtBu > ZOH + CO + C4b-species               | 10  | 179 |
| 21 | ZOH*MeOH > ZOH + + FA                          | 226 | 206 |
| 22 | FA + ZOMe > ZOCOMe                             | 173 | 137 |
| 23 | ZOH + MeOH > ZOH*MeOH                          | 82  | 80  |
| 24 | ZOH + DME > ZOH*DME                            | 80  | 81  |
| 25 | ZOH + H2O > ZOH*H2O                            | 109 | 80  |
| 26 | ZOMe + MeOH > ZOH + CH4 + FA                   | 237 | 345 |
| 27 | ZOMe + DMM > ZOMe + CH4 + MF                   | 205 | 394 |
| 28 | ZOMe + hacetal > ZOH + CH4 + MF                | 215 | 412 |
| 29 | ZOMe + DME > ZOCOMe + CH4                      | 232 | 296 |
| 30 | ZOH*DME + DME > ZOCOMe + CH4 + MeOH            | 245 | 299 |
| 31 | ZOH*MeOH + DME > ZOCOMe + CH4 + H2O            | 260 | 332 |
| 32 | ZOH*DME + DMM > ZOMe + CH4 + MF + MeOH         | 235 | 414 |
| 33 | ZOH*MeOH + DMM > ZOMe + CH4 + MF + H2O         | 255 | 452 |
| 34 | ZOH*DME + hacetal > ZOH*MeOH + CH4 + MF        | 208 | 394 |
| 35 | ZOH*MeOH + hacetal > ZOH*H2O + CH4 + MF        | 248 | 423 |
| 36 | ZOH*MeOH + DME > ZOH*MeOH + CH4 + FA           | 228 | 328 |
| 37 | ZOH*MeOH + MeOH > ZOH*H2O + CH4 + FA           | 275 | 361 |
| 38 | ZOH*MeOH + MeOH > ZOH*DME + H2O                | 192 | 210 |
| 39 | FA + ZOH > ZOH + CO +                          | 251 | 322 |
| 40 | FA + ZOH*DME > s_ch4-fa + ZOH                  | 274 | 456 |
| 41 | DME + ZOCOMe > s_ch4-fa + ZOH                  | 244 | 456 |
| 42 | C4b-species + ZOMe > C5a-species + ZOH         | 147 | 206 |
| 43 | C2-species + ZOMe > C3-species + ZOH           | 176 | 250 |
| 44 | C3-species + ZOMe > C4a-species + ZOH          | 155 | 218 |
| 45 | C4a-species + ZOMe > C5a-species + ZOH         | 154 | 218 |
| 46 | C5a-species + ZOMe > C6a-species + ZOH         | 132 | 196 |
| 47 | C6a-species + ZOMe > C7a-species + ZOH         | 146 | 188 |
| 48 | C2-species + ZOH*MeOH > C3-species + ZOH*H2O   | 208 | 260 |
| 49 | C6a-species + ZOH*MeOH > C7b-species + ZOH*H2O | 140 | 151 |
| 50 | C7b-species + ZOH*MeOH > C8b-species + ZOH*H2O | 156 | 193 |
| 51 | C3-species + ZOH*MeOH > C4a-species + ZOH*H2O  | 195 | 236 |
| 52 | C4a-species + ZOH*MeOH > C5a-species + ZOH*H2O | 178 | 221 |
| 53 | C5a-species + ZOH*MeOH > C6a-species + ZOH*H2O | 157 | 199 |
| 54 | C2-species + ZOH*DME > C3-species + ZOH*MeOH   | 216 | 276 |
| 55 | C3-species + ZOH*DME > C4a-species + ZOH*MeOH  | 208 | 258 |
| 56 | C4a-species + ZOH*DME > C5a-species + ZOH*MeOH | 195 | 247 |
| 57 | C5a-species + ZOH*DME > C6a-species + ZOH*MeOH | 165 | 215 |
| 58 | C6a-species + ZOH*DME > C7b-species + ZOH*MeOH | 173 | 192 |
| 59 | C7b-species + ZOH*DME > C8b-species + ZOH*MeOH | 165 | 210 |
| 60 | C4a-species + ZOH*MeOH > C5b-species + ZOH*H2O | 200 | 232 |
| 61 | C4a-species + ZOH*DME > C5b-species + ZOH*MeOH | 207 | 247 |
| 62 | C5b-species + ZOH*MeOH > C6b-species + ZOH*H2O | 187 | 216 |

|     |                                                     |     |     |
|-----|-----------------------------------------------------|-----|-----|
| 63  | C5b-species + ZOH*DME > C6b-species + ZOH*MeOH      | 208 | 245 |
| 64  | C5b-species + ZOH*MeOH > C6c-species + ZOH*H2O      | 176 | 219 |
| 65  | C5b-species + ZOH*DME > C6c-species + ZOH*MeOH      | 183 | 234 |
| 66  | C6b-species + ZOH*MeOH > C7c-species + ZOH*H2O      | 194 | 227 |
| 67  | C6b-species + ZOH*DME > C7c-species + ZOH*MeOH      | 194 | 235 |
| 68  | C7c-species + ZOH*MeOH > C8c-species + ZOH*H2O      | 201 | 229 |
| 69  | C6b-species + ZOH*MeOH > C7d-species + ZOH*H2O      | 173 | 213 |
| 70  | C6b-species + ZOH*DME > C7d-species + ZOH*MeOH      | 190 | 238 |
| 71  | C7c-species + ZOH*MeOH > C8d-species + ZOH*H2O      | 198 | 238 |
| 72  | C7c-species + ZOH*DME > C8d-species + ZOH*MeOH      | 187 | 234 |
| 73  | C7a-species + ZOMe > C8a-species + ZOH              | 115 | 169 |
| 74  | C8a-species + ZOMe > C9a-species + ZOH              | 130 | 156 |
| 75  | C5a-species + ZOH > C3-species + C2-species + ZOH   | 211 | 185 |
| 76  | C8a-species + ZOH > C3-species + C5a-species + ZOH  | 168 | 183 |
| 77  | C9a-species + ZOH > C4b-species + C5a-species + ZOH | 87  | 145 |
| 78  | C7a-species + ZOH > C3-species + C4a-species + ZOH  | 187 | 191 |
| 79  | C7a-species + ZOH > C2-species + C5a-species + ZOH  | 179 | 174 |
| 80  | C6a-species + ZOMe > C7b-species + ZOH              | 130 | 162 |
| 81  | C7b-species + ZOMe > C8b-species + ZOH              | 110 | 168 |
| 82  | C8b-species + ZOMe > C9a-species + ZOH              | 129 | 160 |
| 83  | C8b-species + ZOH > C4b-species + C4a-species + ZOH | 111 | 135 |
| 84  | C4a-species + ZOMe > C5b-species + ZOH              | 171 | 223 |
| 85  | C5b-species + ZOMe > C6c-species + ZOH              | 149 | 213 |
| 86  | C5b-species + ZOMe > C6b-species + ZOH              | 159 | 209 |
| 87  | C6b-species + ZOMe > C7c-species + ZOH              | 146 | 200 |
| 88  | C7c-species + ZOMe > C8c-species + ZOH              | 174 | 222 |
| 89  | C8c-species + ZOMe > C9b-species + ZOH              | 171 | 220 |
| 90  | C6b-species + ZOMe > C7d-species + ZOH              | 141 | 202 |
| 91  | C7c-species + ZOMe > C8d-species + ZOH              | 154 | 214 |
| 92  | C8c-species + ZOMe > C9c-species + ZOH              | 142 | 208 |
| 93  | C4a-species + ZOH > ZOH + C2-species + C2-species   | 246 | 210 |
| 94  | C5b-species + ZOH > ZOH + C3-species + C2-species   | 238 | 224 |
| 95  | C6c-species + ZOH > ZOH + C4b-species + C2-species  | 186 | 177 |
| 96  | C6c-species + ZOH > ZOH + C3-species + C3-species   | 199 | 194 |
| 97  | C6b-species + ZOH > ZOH + C4a-species + C2-species  | 211 | 209 |
| 98  | C7d-species + ZOH > ZOH + C3-species + C4a-species  | 209 | 220 |
| 99  | C7d-species + ZOH > ZOH + C5a-species + C2-species  | 168 | 169 |
| 100 | C7c-species + ZOH > ZOH + C3-species + C4a-species  | 215 | 233 |
| 101 | C8c-species + ZOH > ZOH + C5b-species + C3-species  | 200 | 221 |
| 102 | C8d-species + ZOH > ZOH + C5b-species + C3-species  | 236 | 245 |
| 103 | C9b-species + ZOH > ZOH + C6b-species + C3-species  | 201 | 224 |
| 104 | C9c-species + ZOH > ZOH + C6b-species + C3-species  | 233 | 238 |
| 105 | acetic_acid + ZOH > A2_O1_pos2 + H2O                | 161 | 126 |
| 106 | acetic_acid + ZOH > A2_O1_pos1 + H2O                | 149 | 110 |



|     |                                                                        |     |     |
|-----|------------------------------------------------------------------------|-----|-----|
| 107 | acetic_acid + ZOH > A2_O3 + H2O                                        | 153 | 103 |
| 108 | A2_O1_pos2 > ZOH + Ketene                                              | 86  | 80  |
| 109 | A2_O3 > ZOH + Ketene                                                   | 80  | 89  |
| 110 | acetic_acid + ZOH > Ethene-1,1-diol + ZOH                              | 183 | 65  |
| 111 | A2_O1_pos1 + Ketene > ZOH + Acetylketene                               | 117 | 134 |
| 112 | A2_O1_pos2 + Ketene > ZOH + Acetylketene                               | 136 | 148 |
| 113 | A2_O3 + Ketene > D5                                                    | 119 | 50  |
| 114 | ZOH + Acetylketene > D5                                                | 116 | 20  |
| 115 | ZOH + Acetylketene > D7                                                | 95  | 62  |
| 116 | D7 + H2O > C5                                                          | 112 | 99  |
| 117 | D5 + H2O > E1                                                          | 36  | 144 |
| 118 | D8 > E1                                                                | 6   | 160 |
| 119 | D5 + H2O > C5                                                          | 37  | 88  |
| 120 | C5 > E1                                                                | 6   | 64  |
| 121 | Acetylketene + H2O > 3-hydroxybut-2-enoic_acid                         | 84  | 77  |
| 122 | 3-hydroxybut-2-enoic_acid + ZOH > C5                                   | 69  | 29  |
| 123 | 3-hydroxybut-2-enoic_acid + ZOH > E1                                   | 128 | 147 |
| 124 | Ketene + Ketene + ZOH > Acetylketene + ZOH                             | 121 | 139 |
| 125 | Ketene + Ketene + ZOH > D4                                             | 171 | 141 |
| 126 | Ketene + Ketene + ZOH > D2                                             | 171 | 47  |
| 127 | D2 + H2O > D3                                                          | 32  | 119 |
| 128 | D3 > D4 + H2O                                                          | 154 | 161 |
| 129 | D3 > E1                                                                | 55  | 122 |
| 130 | D4 > D5                                                                | 105 | 56  |
| 131 | ZOH + Ethene-1,1-diol + acetic_acid > ZOH + 3,3-dihydroxybutanoic_acid | 126 | 101 |
| 132 | ZOH + 3,3-dihydroxybutanoic_acid > B3                                  | 74  | 9   |
| 133 | B3 > C5 + H2O                                                          | 34  | 132 |
| 134 | ZOH + 3,3-dihydroxybutanoic_acid > E1 + H2O                            | 240 | 331 |
| 135 | A2_O1_pos1 + Ethene-1,1-diol > E1                                      | 101 | 208 |
| 136 | A2_O1_pos2 + Ethene-1,1-diol > E1                                      | 114 | 215 |
| 137 | A2_O3 + Ethene-1,1-diol > E1                                           | 117 | 233 |
| 138 | acetic_acid + Ketene + ZOH > E1                                        | 173 | 162 |
| 139 | E1 > ZOH + Propen-2-ol + CO2                                           | 103 | 169 |
| 140 | ZOH + Propen-2-ol > ZOH + Acetone                                      | 72  | 125 |
| 141 | ZOH + Acetone + Propen-2-ol > E6                                       | 128 | 20  |
| 142 | E6 > E8 + H2O                                                          | 24  | 170 |
| 143 | E8 > A2_O1_pos1 + C4b-species                                          | 138 | 125 |
| 144 | E8 > A2_O1_pos2 + C4b-species                                          | 138 | 131 |

#### S4. The (101) surface reactivity:

Below, reactions catalyzed by the Lewis acid site located at the (101) surface of SSZ-13 are shown. For details regarding the surface and the active site, see [J. Phys. Chem. C 2022, 126, 13, 5896–5905]. The reaction mechanisms at Lewis acid sites often differ from those at Brønsted acid sites (see Fig. S2). Adsorbed acetic acid can be considered as a protonated surface acetate, which is why C-C coupling reactions involving surface acetate were not investigated explicitly.

For all reactions, an oxygen is bonded to the Lewis acid site. Additionally, a hydrogen is often shifted from a product oxygen to a zeolite oxygen adjacent to the aluminum. Subsequent hydrogen shift reactions from the zeolite to the product, which are expected to happen easily, were not computed. The aldol self-condensation of acetone (E4-E6\*) yields a deprotonated diacetone instead of its protonated enol (E5) as in the Brønsted-acid-site catalyzed bulk reaction. For the following dehydration to mesityl oxide, diacetone alcohol (E7\*) and its enol (E7) are considered as reactants. For the decomposition of mesityl oxide to acetic acid and isobutene, a water molecule is required for an equivalent mechanism to the Brønsted-acid-site catalyzed reaction.

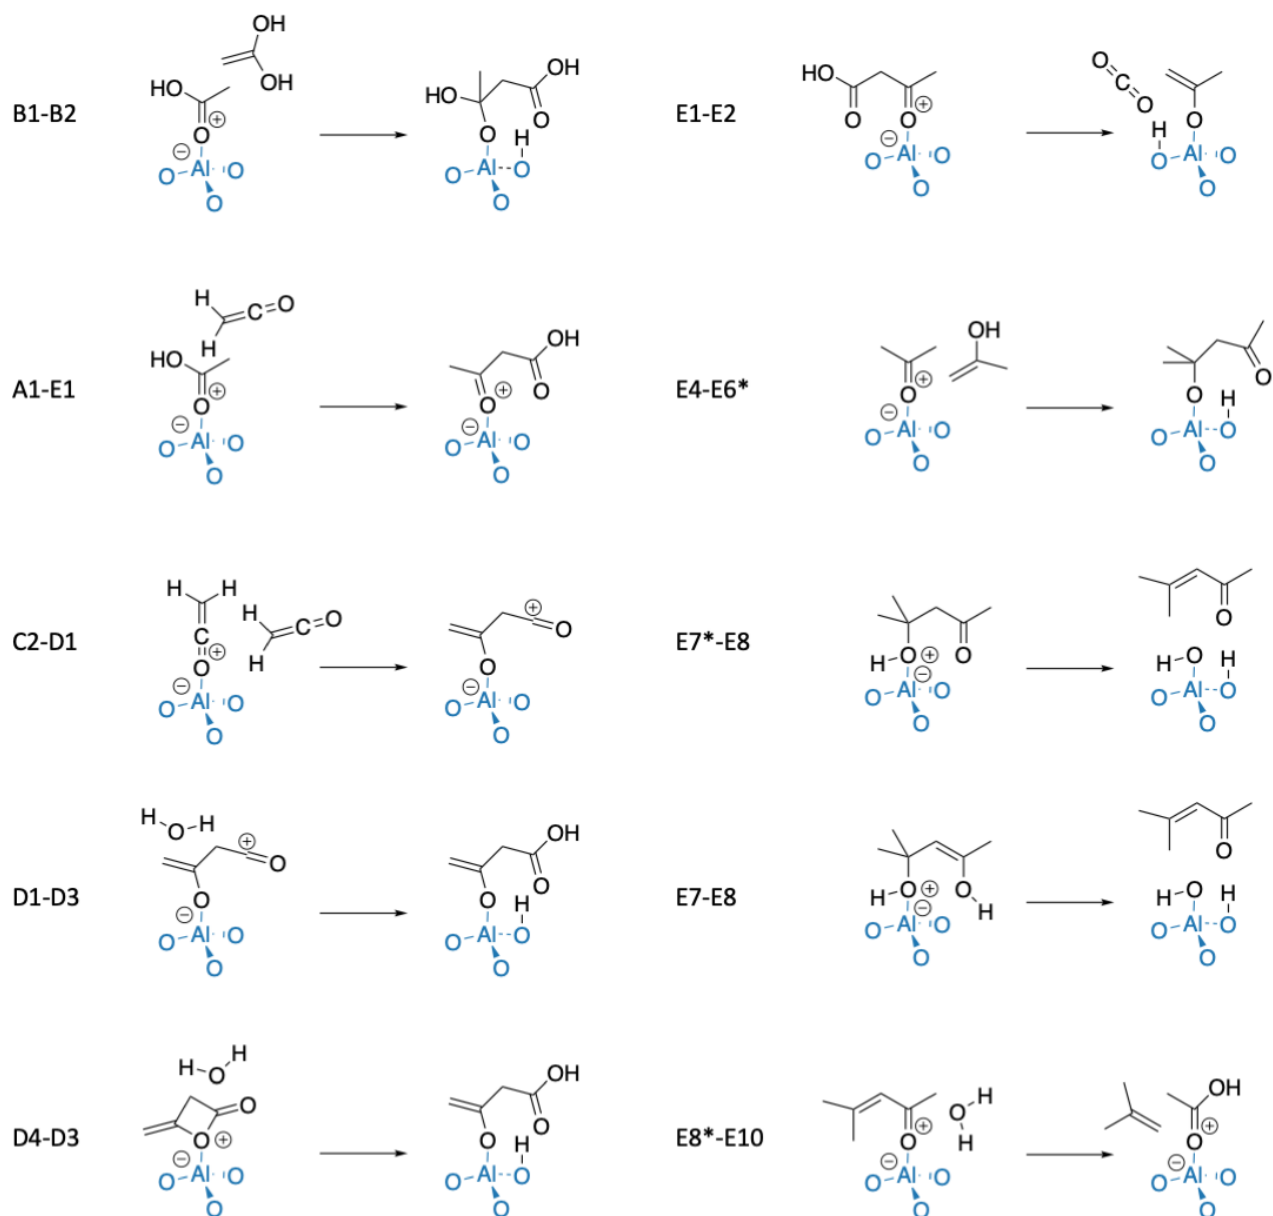

Figure S2: Mechanisms of reactions catalyzed by the (101) surface Lewis acid site.

In Table S1, the free energy barriers of reactions catalyzed by the Lewis acid site are shown. Compared to the Brønsted acid site, these barriers are slightly higher for most transition states. Only the barriers for TS(D4-D3), TS(E1-E2), and TS(E7-E8) are slightly lower at the Lewis acid site. The free energy barrier for TS(E8\*-E10) is approximately 150 kJ/mol higher than the barrier for the equivalent reaction at the Brønsted acid site. This might result from the additionally involved water molecule.

**Table S4: Free energy barriers in kJ/mol of reactions catalyzed by the (101) surface Lewis acid site. Reference states for the Lewis-acid-site catalyzed reactions are the single adsorbed states (acetic acid or acetone). Reference states for the Brønsted-acid-site catalyzed reactions are gaseous acetic acid or gaseous acetone and the empty zeolite.**

| Reaction                         | B1-B2 | A1-E1 | C2-D1 | D1-D3 | D4-D3 | E1-E2 | E4-E6* | E7*-E8 | E7-E8 | E8*-E10 |
|----------------------------------|-------|-------|-------|-------|-------|-------|--------|--------|-------|---------|
| (101) surface<br>Lewis acid site | 270   | 230   | 261   | 254   | 260   | 141   | 177    | 215    | 177   | 305     |
| Bulk Brønsted<br>acid site       | 243   | 214   | 252   | 237   | 272   | 155   | 169    |        | 185   | 153     |

## S5 Total energies and frequencies:

The periodic PBE-D3 energies, corresponding D3 energies and ZPVE as well as PBE-D3 energies from cluster models are listed in Table S4. For the cluster models, HF/cc-pVXZ (X=D,T,Q) are listed in Table S5. MP2/cc-pVXZ (X=D,T) and CCSD(T)/cc-pVDZ energies are given in Tables S6. The obtained harmonic frequencies are listed in Table S7.

**Table S5. Periodic PBE-D3 energies, corresponding D3 contribution, ZPVE and PBE-D3 energies of cluster models in eV.**

| System                          | PBE-D3   | D3     | ZPVE  | PBE-D3 CM   |
|---------------------------------|----------|--------|-------|-------------|
| <b>Gas phase</b>                |          |        |       |             |
| Acetic_acid                     | -46.814  | -0.045 | 1.623 | -6229.555   |
| H2O                             | -14.225  | -0.000 | 0.563 | -2078.416   |
| Ethene-1_1-diol                 | -45.621  | -0.042 | 1.611 | -6228.334   |
| 3_3-dihydroxybutanoic_acid      | -93.407  | -0.209 | 3.370 | -12458.862  |
| 3-hydroxybut-2-enoic_acid       | -78.899  | -0.118 | 2.654 | -10380.109  |
| Ketene                          | -30.974  | -0.013 | 0.830 | -4149.503   |
| 3-hydroxybut-3-enoic_acid       | -78.173  | -0.133 | 2.643 | -10379.529  |
| Diketene                        | -63.000  | -0.070 | 1.909 | -8300.054   |
| Acetylketene                    | -63.343  | -0.078 | 1.858 | -8300.377   |
| CO2                             | -22.993  | -0.002 | 0.307 | -5128.782   |
| 3-oxobutanoic_acid              | -78.870  | -0.128 | 2.618 | -10380.115  |
| Propen-2-ol                     | -55.508  | -0.064 | 2.224 | -5251.031   |
| Mesityl_oxide                   | -97.692  | -0.167 | 3.825 | -8424.545   |
| Acetone                         | -56.042  | -0.067 | 2.202 | -5251.595   |
| (Z)-4-methylpent-2-ene-2_4-diol | -112.136 | -0.250 | 4.588 | -10503.194  |
| Isobutene                       | -65.436  | -0.083 | 2.841 | -4273.788   |
| TS(C2-D4)_gas                   | -61.231  | -0.084 | 1.788 | -8298.246   |
| TS(C3-C4)_gas                   | -77.844  | -0.134 | 2.507 | -10379.098  |
| <b>Bulk</b>                     |          |        |       |             |
| ZOH                             | -862.579 | -5.920 | 1.254 | -509092.732 |
| ZOH*H2O                         | -877.877 | -6.083 | 1.893 | -511172.357 |
| ZOH*AcOH                        | -910.814 | -6.403 | 2.873 | -515323.851 |
| TS(A1-A2_o1_pos1)               | -909.200 | -6.506 | 2.851 | -515322.282 |
| TS(A1-A2_o1_pos2)               | -909.007 | -6.481 | 2.836 | -515322.107 |
| TS(A1-A2_o3)                    | -909.069 | -6.445 | 2.830 | -515322.162 |
| A2_o1_is*H2O                    | -909.316 | -6.483 | 2.848 | -515322.400 |
| A2_o1_os*H2O                    | -909.437 | -6.448 | 2.849 | -515322.518 |
| A2_o3_is*H2O                    | -909.275 | -6.466 | 2.837 | -515322.274 |
| A2_o1_is                        | -894.798 | -6.286 | 2.215 | -513243.563 |
| A2_o1_os                        | -894.832 | -6.286 | 2.214 | -513243.646 |
| A2_o3_is                        | -894.701 | -6.276 | 2.210 | -513243.474 |
| TS(A2_o1_pos2-A3)               | -894.242 | -6.295 | 1.501 | -513242.952 |
| TS(A2_o3-pos1-A3)               | -894.228 | -6.282 | 2.142 | -513242.968 |
| A3                              | -894.230 | -6.282 | 2.137 | -513242.978 |
| TS(A3-C3)                       | -894.276 | -6.289 | 2.035 | -513243.046 |
| ZOH*Ketene                      | -894.248 | -6.279 | 2.128 | -513243.043 |
| ZOH*2xKetene                    | -925.705 | -6.714 | 3.005 | -517393.034 |

|                                   |          |        |       |             |
|-----------------------------------|----------|--------|-------|-------------|
| ZOH*AcOH*Ketene                   | -942.189 | -6.890 | 3.739 | -519473.709 |
| TS(C2-C3)                         | -925.700 | -6.638 | 2.895 | -517393.029 |
| ZOH*Acetylketene                  | -927.443 | -6.700 | 3.130 | -517394.733 |
| TS(C3-C4)_catalyzed               | -941.950 | -6.818 | 3.847 | -519473.488 |
| ZOH*3-hydroxybut-2-enoic_acid     | -943.230 | -6.805 | 3.897 | -519474.694 |
| TS(C4-C5)                         | -942.519 | -6.807 | 3.798 | -519474.042 |
| C5                                | -942.666 | -6.771 | 3.862 | -519474.196 |
| TS(C5-E1)                         | -942.476 | -6.798 | 3.889 | -519473.991 |
| TS(C4-E1)                         | -941.838 | -6.886 | 3.807 | -519473.373 |
| TS(A1-E1)                         | -941.446 | -6.810 | 3.865 | -519473.011 |
| TS(A1-B1)                         | -910.814 | -6.403 | 2.873 | -515323.851 |
| ZOH*Ethene-1,1-diol               | -909.093 | -6.344 | 2.894 | -515322.121 |
| ZOH*AcOH*Ethene-1_1-diol          | -957.143 | -7.015 | 4.517 | -521552.925 |
| TS(B1-B2)                         | -957.096 | -6.992 | 4.599 | -521552.871 |
| ZOH*3_3-dihydroxybutanoic_acid    | -957.245 | -6.971 | 4.627 | -521552.976 |
| TS(B2-E1)                         | -955.337 | -6.959 | 4.505 | -521551.056 |
| TS(B2-B3)                         | -957.137 | -6.910 | 4.605 | -521552.799 |
| B3                                | -957.168 | -6.905 | 4.618 | -521552.871 |
| TS(B3-C5)                         | -956.925 | -6.928 | 4.607 | -521552.672 |
| C5*H2O                            | -957.854 | -6.977 | 4.478 | -521553.625 |
| B4_o1_pos1                        | -941.074 | -6.866 | 3.858 | -519472.620 |
| B4_o1_pos2                        | -941.150 | -6.846 | 3.856 | -519472.701 |
| B4_o3                             | -941.005 | -6.863 | 3.855 | -519472.483 |
| TS(B4-E1_o1_pos1)                 | -940.855 | -6.862 | 3.829 | -519472.425 |
| TS(B4-E1_o1_pos2)                 | -940.793 | -6.839 | 3.813 | -519472.359 |
| TS(B4-E1_o3)                      | -940.641 | -6.856 | 4.149 | -519472.196 |
| A2_o1_pos1*Ketene                 | -926.169 | -6.634 | 3.071 | -517393.491 |
| A2_o1_pos2*Ketene                 | -926.250 | -6.676 | 3.073 | -517393.592 |
| A2_o3*Ketene                      | -926.136 | -6.670 | 3.069 | -517393.423 |
| TS(A2-C3_o1_pos1)                 | -925.768 | -6.683 | 3.035 | -517393.127 |
| TS(A2-C3_o1_pos2)                 | -925.595 | -6.663 | 3.033 | -517392.962 |
| TS(A2-D5_o3)                      | -925.695 | -6.674 | 3.043 | -517393.052 |
| TS(E1-E2)                         | -942.267 | -6.814 | 3.849 | -519473.814 |
| ZOH*Propen-2-ol*CO2               | -942.366 | -6.770 | 3.852 | -519473.978 |
| ZOH*Propen-2-ol                   | -919.290 | -6.525 | 3.528 | -514345.066 |
| TS(E2-E3)                         | -918.830 | -6.505 | 3.519 | -514344.656 |
| ZOH*Acetone                       | -919.960 | -6.563 | 3.472 | -514345.482 |
| ZOH*Acetone*Propen-2-ol           | -976.378 | -7.258 | 5.736 | -519597.728 |
| TS(E4-E5)                         | -976.319 | -7.247 | 5.799 | -519597.678 |
| E5                                | -976.629 | -7.191 | 5.832 | -519597.990 |
| TS(E5-E6)                         | -976.101 | -7.236 | 5.766 | -519597.456 |
| ZOH*Z-4-methylpent-2-ene-2-4-diol | -976.180 | -7.244 | 5.875 | -519597.560 |
| TS(E6-E7)                         | -975.878 | -7.191 | 5.872 | -519597.252 |
| E7                                | -976.360 | -7.223 | 5.816 | -519597.651 |

|                                |           |         |       |             |
|--------------------------------|-----------|---------|-------|-------------|
| TS(E7-E8)                      | -976.023  | -7.214  | 5.842 | -519597.253 |
| ZOH*MO                         | -962.229  | -7.135  | 5.146 | -517519.195 |
| TS(E8-E9)                      | -960.853  | -7.050  | 4.986 | -517517.932 |
| E9                             | -961.091  | -7.000  | 5.067 | -517518.188 |
| TS(E9-10_pos2)                 | -960.418  | -7.046  | 5.018 | -517517.581 |
| TS(E9-10_pos1)                 | -960.548  | -7.067  | 5.028 | -517517.650 |
| A2*Isobutene_pos2              | -960.975  | -7.036  | 5.085 | -517518.127 |
| A2*Isobutene_pos1              | -960.871  | -7.061  | 5.084 | -517518.026 |
| TS(C3-D5)                      | -926.342  | -6.661  | 3.036 | -517393.650 |
| D5                             | -926.406  | -6.641  | 3.115 | -517393.714 |
| D5*H2O                         | -941.334  | -6.784  | 3.755 | -519472.922 |
| TS(D5-D7)                      | -926.428  | -6.589  | 3.128 | -517393.813 |
| D7                             | -926.919  | -6.650  | 3.197 | -517394.237 |
| D7*H2O                         | -941.567  | -6.876  | 3.844 | -519473.143 |
| TS(D7-C5)                      | -941.262  | -6.794  | 3.800 | -519472.862 |
| TS(D5-C5)                      | -941.287  | -6.785  | 3.795 | -519472.740 |
| TS(D5-D8)                      | -941.289  | -6.791  | 3.741 | -519472.902 |
| D8                             | -941.551  | -6.782  | 3.836 | -519473.137 |
| TS(D8-E1)                      | -941.468  | -6.812  | 4.027 | -519473.039 |
| TS(D5-D6)                      | -925.957  | -6.574  | 3.104 | -517393.077 |
| D6                             | -926.209  | -6.577  | 3.143 | -517393.468 |
| TS(D6-D4)                      | -926.196  | -6.577  | 3.090 | -517393.459 |
| ZOH*Diketene                   | -926.891  | -6.554  | 3.180 | -517394.155 |
| TS(C2-D1)                      | -925.452  | -6.645  | 3.022 | -517392.790 |
| D1                             | -925.975  | -6.644  | 3.146 | -517393.134 |
| TS(D1-D4)                      | -925.916  | -6.716  | 3.112 | -517393.093 |
| ZOH*Diketene*H2O               | -941.626  | -6.787  | 3.823 | -519473.149 |
| TS(D4-D3)                      | -940.870  | -6.877  | 3.791 | -519472.384 |
| ZOH*3-hydroxy-but-2-enoic-acid | -942.398  | -6.859  | 3.907 | -519473.894 |
| TS(D1-D2)                      | -925.844  | -6.655  | 3.180 | -517393.193 |
| D2                             | -925.875  | -6.636  | 3.203 | -517393.228 |
| D2*H2O                         | -941.065  | -6.855  | 3.854 | -519472.638 |
| TS(D2-D3)                      | -940.895  | -6.802  | 3.830 | -519472.480 |
| TS(D2-E1)                      | -942.077  | -6.876  | 3.815 | -519473.597 |
| TS(DAA_dehydration)            | -975.784  | -7.226  | 5.732 | -519597.014 |
| <b>Z(101)</b>                  |           |         |       |             |
| Z(101)                         | -1792.635 | -11.166 | 0.737 | -732986.127 |
| Z*AcOH                         | -1841.375 | -11.367 | 2.398 | -739217.618 |
| Z*Ketene                       | -1824.442 | -11.302 | 1.615 | -737136.464 |
| Z*Diketene                     | -1856.826 | -11.481 | 2.673 | -741287.370 |
| Z*E1                           | -1873.457 | -11.647 | 3.415 | -743368.199 |
| Z*Acetone                      | -1850.379 | -11.403 | 3.000 | -738239.454 |
| Z*Mesityl_oxide                | -1892.362 | -11.819 | 4.614 | -741412.726 |
| TS(C2-D1)                      | -1855.824 | -11.525 | 2.510 | -741286.367 |

|             |           |         |       |             |
|-------------|-----------|---------|-------|-------------|
| TS(D1-D3)   | -1871.320 | -11.699 | 3.271 | -743366.049 |
| TS(D4-D3)   | -1871.400 | -11.647 | 3.322 | -743366.199 |
| TS(A1-E1)   | -1871.814 | -11.691 | 3.330 | -743366.557 |
| TS(B1-B2)   | -1887.207 | -11.754 | 4.079 | -745446.178 |
| TS(E1-E2)   | -1872.686 | -11.655 | 3.321 | -743367.497 |
| TS(E4-E6*)  | -1906.531 | -11.845 | 5.308 | -743491.182 |
| TS(E7*-E8)  | -1905.856 | -11.924 | 5.136 | -743490.445 |
| TS(E7-E8)   | -1906.375 | -11.893 | 5.324 | -743491.003 |
| TS(E8*-E10) | -1905.173 | -11.897 | 5.178 | -743489.726 |

Table S6. HF energies of cluster models in eV.

| System                          | HF/cc-pVDZ  | HF/cc-pVTZ  | HF/cc-pVQZ  |
|---------------------------------|-------------|-------------|-------------|
| <b>Gas phase</b>                |             |             |             |
| Acetic_acid                     | -6199.558   | -6201.446   | -6201.910   |
| H2O                             | -2068.762   | -2069.584   | -2069.792   |
| Ethene-1_1-diol                 | -6198.208   | -6200.162   | -6200.633   |
| 3_3-dihydroxybutanoic_acid      | -12398.671  | -12402.373  | -12403.280  |
| 3-hydroxybut-2-enoic_acid       | -10329.343  | -10332.339  | -10333.082  |
| Ketene                          | -4129.006   | -4130.195   | -4130.493   |
| 3-hydroxybut-3-enoic_acid       | -10328.855  | -10331.891  | -10332.643  |
| Diketene                        | -8258.804   | -8261.176   | -8261.749   |
| Acetylketene                    | -8259.347   | -8261.628   | -8262.209   |
| CO2                             | -5106.133   | -5107.646   | -5108.032   |
| 3-oxobutanoic_acid              | -10329.432  | -10332.432  | -10333.180  |
| Propen-2-ol                     | -5223.168   | -5224.763   | -5225.143   |
| Mesityl_oxide                   | -8378.521   | -8380.781   | -8381.341   |
| Acetone                         | -5223.922   | -5225.449   | -5225.818   |
| (Z)-4-methylpent-2-ene-2_4-diol | -10447.332  | -10450.326  | -10451.049  |
| Isobutene                       | -4248.335   | -4249.515   | -4249.799   |
| TS(C2-D4)_gas                   | -8256.289   | -8258.698   | -8259.310   |
| TS(C3-C4)_gas                   | -10328.193  | -10331.215  | -10331.973  |
| <b>Bulk</b>                     |             |             |             |
| ZOH                             | -507910.158 | -508016.896 | -508040.489 |
| ZOH*H2O                         | -509979.932 | -510087.047 | -510110.763 |
| ZOH*AcOH                        | -514110.667 | -514218.849 | -514242.840 |
| TS(A1-A2_o1_pos1)               | -514108.946 | -514216.857 | -514240.846 |
| TS(A1-A2_o1_pos2)               | -514108.894 | -514216.812 | -514240.797 |
| TS(A1-A2_o3)                    | -514108.905 | -514216.854 | -514240.847 |
| A2_o1_is*H2O                    | -514109.334 | -514217.437 | -514241.430 |
| A2_o1_os*H2O                    | -514109.461 | -514217.657 | -514241.666 |
| A2_o3_is*H2O                    | -514109.110 | -514217.430 | -514241.449 |
| A2_o1_is                        | -512040.299 | -512147.852 | -512171.702 |
| A2_o1_os                        | -512040.438 | -512147.924 | -512171.770 |
| A2_o3_is                        | -512040.108 | -512147.749 | -512171.609 |
| TS(A2_o1_pos2-A3)               | -512039.859 | -512147.155 | -512170.994 |

|                                |             |             |             |
|--------------------------------|-------------|-------------|-------------|
| TS(A2_o3-pos1-A3)              | -512039.683 | -512146.988 | -512170.841 |
| A3                             | -512039.609 | -512146.908 | -512170.751 |
| TS(A3-C3)                      | -512039.178 | -512146.677 | -512170.520 |
| ZOH*Ketene                     | -512039.658 | -512147.337 | -512171.196 |
| ZOH*2xKetene                   | -516168.794 | -516277.466 | -516301.560 |
| ZOH*AcOH*Ketene                | -518239.582 | -518348.743 | -518372.959 |
| TS(C2-C3)                      | -516168.259 | -516276.824 | -516300.922 |
| ZOH*Acetylketene               | -516170.326 | -516278.757 | -516302.815 |
| TS(C3-C4)_catalyzed            | -518239.234 | -518348.180 | -518372.391 |
| ZOH*3-hydroxybut-2-enoic_acid  | -518240.483 | -518349.668 | -518373.893 |
| TS(C4-C5)                      | -518239.555 | -518348.671 | -518372.895 |
| C5                             | -518240.193 | -518349.151 | -518373.356 |
| TS(C5-E1)                      | -518240.261 | -518349.190 | -518373.405 |
| TS(C4-E1)                      | -518238.946 | -518347.931 | -518372.133 |
| TS(A1-E1)                      | -518238.930 | -518347.943 | -518372.157 |
| TS(A1-B1)                      | -514110.667 | -514218.849 | -514242.840 |
| ZOH*Ethene-1,1-diol            | -514108.795 | -514217.278 | -514241.305 |
| ZOH*AcOH*Ethene-1_1-diol       | -520309.180 | -520418.962 | -520443.321 |
| TS(B1-B2)                      | -520308.608 | -520418.424 | -520442.791 |
| ZOH*3_3-dihydroxybutanoic_acid | -520309.173 | -520419.021 | -520443.386 |
| TS(B2-E1)                      | -520306.610 | -520416.552 | -520440.920 |
| TS(B2-B3)                      | -520308.928 | -520418.759 | -520443.136 |
| B3                             | -520309.057 | -520418.826 | -520443.200 |
| TS(B3-C5)                      | -520308.955 | -520418.516 | -520442.880 |
| C5*H2O                         | -520309.664 | -520419.489 | -520443.858 |
| B4_o1_pos1                     | -518238.758 | -518347.956 | -518372.188 |
| B4_o1_pos2                     | -518238.887 | -518348.131 | -518372.370 |
| B4_o3                          | -518238.477 | -518347.879 | -518372.133 |
| TS(B4-E1_o1_pos1)              | -518238.354 | -518347.343 | -518371.582 |
| TS(B4-E1_o1_pos2)              | -518238.405 | -518347.331 | -518371.551 |
| TS(B4-E1_o3)                   | -518238.009 | -518347.094 | -518371.338 |
| A2_o1_pos1*Ketene              | -516169.489 | -516278.120 | -516302.218 |
| A2_o1_pos2*Ketene              | -516169.578 | -516278.167 | -516302.258 |
| A2_o3*Ketene                   | -516169.307 | -516277.960 | -516302.062 |
| TS(A2-C3_o1_pos1)              | -516168.882 | -516277.207 | -516301.295 |
| TS(A2-C3_o1_pos2)              | -516168.771 | -516277.136 | -516301.227 |
| TS(A2-D5_o3)                   | -516168.725 | -516277.144 | -516301.242 |
| TS(E1-E2)                      | -518239.255 | -518348.620 | -518372.865 |
| ZOH*Propen-2-ol*CO2            | -518240.294 | -518349.694 | -518373.948 |
| ZOH*Propen-2-ol                | -513134.075 | -513241.937 | -513265.804 |
| TS(E2-E3)                      | -513133.766 | -513241.834 | -513265.751 |
| ZOH*Acetone                    | -513134.607 | -513242.589 | -513266.500 |
| ZOH*Acetone*Propen-2-ol        | -518358.457 | -518467.561 | -518491.716 |
| TS(E4-E5)                      | -518358.041 | -518467.062 | -518491.221 |



|                                   |             |             |             |
|-----------------------------------|-------------|-------------|-------------|
| E5                                | -518358.552 | -518467.574 | -518491.727 |
| TS(E5-E6)                         | -518357.498 | -518466.623 | -518490.783 |
| ZOH*Z-4-methylpent-2-ene-2-4-diol | -518357.946 | -518467.239 | -518491.420 |
| TS(E6-E7)                         | -518357.833 | -518467.138 | -518491.298 |
| E7                                | -518357.839 | -518466.834 | -518490.957 |
| TS(E7-E8)                         | -518357.678 | -518466.499 | -518490.638 |
| ZOH*MO                            | -516289.556 | -516397.765 | -516421.763 |
| TS(E8-E9)                         | -516288.031 | -516396.379 | -516420.399 |
| E9                                | -516288.455 | -516396.676 | -516420.690 |
| TS(E9-10_pos2)                    | -516288.134 | -516396.513 | -516420.547 |
| TS(E9-10_pos1)                    | -516288.297 | -516396.559 | -516420.590 |
| A2*Isobutene_pos2                 | -516288.853 | -516397.393 | -516421.432 |
| A2*Isobutene_pos1                 | -516288.690 | -516397.145 | -516421.171 |
| TS(C3-D5)                         | -516168.800 | -516277.229 | -516301.308 |
| D5                                | -516169.302 | -516277.661 | -516301.753 |
| D5*H2O                            | -518238.768 | -518347.829 | -518372.075 |
| TS(D5-D7)                         | -516169.462 | -516277.922 | -516302.028 |
| D7                                | -516170.242 | -516278.817 | -516302.916 |
| D7*H2O                            | -518239.281 | -518348.469 | -518372.708 |
| TS(D7-C5)                         | -518238.879 | -518347.864 | -518372.090 |
| TS(D5-C5)                         | -518238.879 | -518347.903 | -518372.144 |
| TS(D5-D8)                         | -518238.879 | -518347.937 | -518372.170 |
| D8                                | -518238.924 | -518347.718 | -518371.936 |
| TS(D8-E1)                         | -518238.832 | -518347.710 | -518371.937 |
| TS(D5-D6)                         | -516169.081 | -516277.334 | -516301.427 |
| D6                                | -516168.896 | -516277.301 | -516301.376 |
| TS(D6-D4)                         | -516168.588 | -516277.046 | -516301.120 |
| ZOH*Diketene                      | -516169.814 | -516278.566 | -516302.652 |
| TS(C2-D1)                         | -516168.039 | -516276.648 | -516300.737 |
| D1                                | -516168.748 | -516276.979 | -516301.041 |
| TS(D1-D4)                         | -516168.669 | -516276.905 | -516300.951 |
| ZOH*Diketene*H2O                  | -518238.920 | -518348.304 | -518372.545 |
| TS(D4-D3)                         | -518237.563 | -518346.628 | -518370.857 |
| ZOH*3-hydroxy-but-2-enoic-acid    | -518239.805 | -518349.137 | -518373.374 |
| TS(D1-D2)                         | -516168.546 | -516276.922 | -516301.000 |
| D2                                | -516168.864 | -516277.254 | -516301.316 |
| D2*H2O                            | -518238.501 | -518347.706 | -518371.935 |
| TS(D2-D3)                         | -518238.367 | -518347.380 | -518371.620 |
| TS(D2-E1)                         | -518239.078 | -518348.267 | -518372.478 |
| TS(DAA_dehydration)               | -518357.792 | -518466.675 | -518490.837 |
| (101)                             |             |             |             |
| Z(101)                            | -731236.971 | -731396.448 | -731431.562 |
| Z*AcOH                            | -737438.443 | -737599.552 | -737635.124 |
| Z*Ketene                          | -735366.852 | -735527.391 | -735562.804 |

|                 |             |             |             |
|-----------------|-------------|-------------|-------------|
| Z*Diketene      | -739497.019 | -739658.582 | -739694.263 |
| Z*E1            | -741568.236 | -741730.225 | -741766.035 |
| Z*Acetone       | -736462.703 | -736623.465 | -736658.933 |
| Z*Mesityl_oxide | -739617.451 | -739778.657 | -739814.251 |
| TS(C2-D1)       | -739495.649 | -739657.196 | -739692.885 |
| TS(D1-D3)       | -741565.847 | -741727.926 | -741763.762 |
| TS(D4-D3)       | -741565.709 | -741727.664 | -741763.490 |
| TS(A1-E1)       | -741566.176 | -741728.191 | -741764.018 |
| TS(B1-B2)       | -743635.982 | -743798.821 | -743834.807 |
| TS(E1-E2)       | -741567.380 | -741729.427 | -741765.232 |
| TS(E4-E6*)      | -741685.625 | -741847.647 | -741883.419 |
| TS(E7*-E8)      | -741684.720 | -741846.735 | -741882.527 |
| TS(E7-E8)       | -741685.562 | -741847.558 | -741883.334 |
| TS(E8*-E10)     | -741683.639 | -741845.551 | -741881.312 |

Table S7. DLPNO-MP2 and DLPNO-CCSD(T) energies of cluster models in eV.

| System                          | MP2/cc-pVDZ | MP2/cc-pVTZ | CCSD(T)/cc-pVDZ |
|---------------------------------|-------------|-------------|-----------------|
| <b>Gas phase</b>                |             |             |                 |
| Acetic_acid                     | -6217.031   | -6223.327   | -6218.242       |
| H2O                             | -2074.278   | -2076.729   | -2074.624       |
| Ethene-1_1-diol                 | -6215.627   | -6222.065   | -6216.866       |
| 3_3-dihydroxybutanoic_acid      | -12433.950  | -12446.606  | -12436.346      |
| 3-hydroxybut-2-enoic_acid       | -10358.970  | -10369.321  | -10360.998      |
| Ketene                          | -4140.950   | -4144.931   | -4141.806       |
| 3-hydroxybut-3-enoic_acid       | -10358.476  | -10368.839  | -10360.557      |
| Diketene                        | -8282.930   | -8290.984   | -8284.673       |
| Acetylketene                    | -8283.405   | -8291.322   | -8285.059       |
| CO2                             | -5119.379   | -5124.127   | -5119.737       |
| 3-oxobutanoic_acid              | -10359.097  | -10369.358  | -10361.163      |
| Propen-2-ol                     | -5239.540   | -5245.067   | -5241.184       |
| Mesityl_oxide                   | -8405.953   | -8414.431   | -8408.792       |
| Acetone                         | -5240.287   | -5245.655   | -5241.914       |
| (Z)-4-methylpent-2-ene-2_4-diol | -10480.597  | -10491.506  | -10483.745      |
| Isobutene                       | -4263.654   | -4268.186   | -4265.662       |
| TS(C2-D4)_gas                   | -8280.892   | -8288.964   | -8282.472       |
| TS(C3-C4)_gas                   | -10357.976  | -10368.296  | -10359.944      |
| <b>Bulk</b>                     |             |             |                 |
| ZOH                             | -508366.066 | -508599.555 | -508387.946     |
| ZOH*H2O                         | -510441.906 | -510677.419 | -510464.084     |
| ZOH*AcOH                        | -514584.871 | -514824.279 | -514607.919     |
| TS(A1-A2_o1_pos1)               | -514583.620 | -514822.847 | -514606.603     |
| TS(A1-A2_o1_pos2)               | -514583.511 | -514822.730 | -514606.486     |
| TS(A1-A2_o3)                    | -514583.521 | -514822.751 | -514606.507     |
| A2_o1_is*H2O                    | -514583.679 | -514823.061 | -514606.747     |
| A2_o1_os*H2O                    | -514583.702 | -514823.117 | -514606.758     |

|                                |             |             |             |
|--------------------------------|-------------|-------------|-------------|
| A2_o3_is*H2O                   | -514583.342 | -514822.895 | -514606.395 |
| A2_o1_is                       | -512508.785 | -512745.909 | -512531.524 |
| A2_o1_os                       | -512508.902 | -512745.981 | -512531.645 |
| A2_o3_is                       | -512508.594 | -512745.805 | -512531.317 |
| TS(A2_o1_pos2-A3)              | -512508.393 | -512745.339 | -512531.050 |
| TS(A2_o3-pos1-A3)              | -512508.328 | -512745.284 | -512530.966 |
| A3                             | -512508.286 | -512745.245 | -512530.919 |
| TS(A3-C3)                      | -512508.088 | -512745.211 | -512530.668 |
| ZOH*Ketene                     | -512507.934 | -512745.236 | -512530.665 |
| ZOH*2xKetene                   | -516649.460 | -516890.645 | -516673.012 |
| ZOH*AcOH*Ketene                | -518726.254 | -518969.575 | -518750.124 |
| TS(C2-C3)                      | -516649.517 | -516890.538 | -516672.897 |
| ZOH*Acetylketene               | -516651.413 | -516892.341 | -516674.852 |
| TS(C3-C4)_catalyzed            | -518726.132 | -518969.300 | -518749.935 |
| ZOH*3-hydroxybut-2-enoic_acid  | -518727.104 | -518970.521 | -518750.969 |
| TS(C4-C5)                      | -518726.438 | -518969.789 | -518750.256 |
| C5                             | -518726.868 | -518970.005 | -518750.760 |
| TS(C5-E1)                      | -518726.772 | -518969.882 | -518750.690 |
| TS(C4-E1)                      | -518725.990 | -518969.197 | -518749.825 |
| TS(A1-E1)                      | -518725.940 | -518969.123 | -518749.748 |
| TS(A1-B1)                      | -514584.871 | -514824.279 | -514607.919 |
| ZOH*Ethene-1,1-diol            | -514582.816 | -514822.587 | -514605.905 |
| ZOH*AcOH*Ethene-1_1-diol       | -520801.425 | -521047.037 | -520825.704 |
| TS(B1-B2)                      | -520801.157 | -521046.830 | -520825.365 |
| ZOH*3_3-dihydroxybutanoic_acid | -520801.589 | -521047.281 | -520825.821 |
| TS(B2-E1)                      | -520799.550 | -521045.286 | -520823.708 |
| TS(B2-B3)                      | -520801.315 | -521047.014 | -520825.534 |
| B3                             | -520801.435 | -521047.077 | -520825.657 |
| TS(B3-C5)                      | -520801.295 | -521046.704 | -520825.548 |
| C5*H2O                         | -520802.154 | -521047.771 | -520826.349 |
| B4_o1_pos1                     | -518725.305 | -518968.654 | -518749.266 |
| B4_o1_pos2                     | -518725.334 | -518968.717 | -518749.298 |
| B4_o3                          | -518724.999 | -518968.514 | -518748.939 |
| TS(B4-E1_o1_pos1)              | -518725.210 | -518968.423 | -518749.068 |
| TS(B4-E1_o1_pos2)              | -518725.239 | -518968.371 | -518749.077 |
| TS(B4-E1_o3)                   | -518724.919 | -518968.214 | -518748.778 |
| A2_o1_pos1*Ketene              | -516650.181 | -516891.245 | -516673.767 |
| A2_o1_pos2*Ketene              | -516650.293 | -516891.318 | -516673.865 |
| A2_o3*Ketene                   | -516650.064 | -516891.144 | -516673.628 |
| TS(A2-C3_o1_pos1)              | -516650.012 | -516890.826 | -516673.468 |
| TS(A2-C3_o1_pos2)              | -516649.884 | -516890.708 | -516673.325 |
| TS(A2-D5_o3)                   | -516649.832 | -516890.752 | -516673.289 |
| TS(E1-E2)                      | -518726.151 | -518969.619 | -518749.904 |
| ZOH*Propen-2-ol*CO2            | -518726.649 | -518970.093 | -518750.474 |

|                                   |             |             |             |
|-----------------------------------|-------------|-------------|-------------|
| ZOH*Propen-2-ol                   | -513607.242 | -513845.848 | -513630.717 |
| TS(E2-E3)                         | -513606.681 | -513845.443 | -513630.159 |
| ZOH*Acetone                       | -513607.615 | -513846.232 | -513631.084 |
| ZOH*Acetone*Propen-2-ol           | -518848.595 | -519092.411 | -518873.646 |
| TS(E4-E5)                         | -518848.392 | -519092.170 | -518873.434 |
| E5                                | -518849.002 | -519092.762 | -518873.998 |
| TS(E5-E6)                         | -518848.312 | -519092.217 | -518873.211 |
| ZOH*Z-4-methylpent-2-ene-2-4-diol | -518848.486 | -519092.515 | -518873.425 |
| TS(E6-E7)                         | -518848.194 | -519092.251 | -518873.188 |
| E7                                | -518848.788 | -519092.605 | -518873.711 |
| TS(E7-E8)                         | -518848.308 | -519091.978 | -518873.280 |
| ZOH*MO                            | -516774.221 | -517015.599 | -516798.872 |
| TS(E8-E9)                         | -516772.667 | -517014.155 | -516797.330 |
| E9                                | -516772.835 | -517014.162 | -516797.580 |
| TS(E9-10_pos2)                    | -516772.793 | -517014.222 | -516797.390 |
| TS(E9-10_pos1)                    | -516772.987 | -517014.329 | -516797.599 |
| A2*Isobutene_pos2                 | -516773.225 | -517014.762 | -516797.947 |
| A2*Isobutene_pos1                 | -516773.224 | -517014.713 | -516797.936 |
| TS(C3-D5)                         | -516650.359 | -516891.261 | -516673.742 |
| D5                                | -516650.500 | -516891.371 | -516673.947 |
| D5*H2O                            | -518725.629 | -518968.819 | -518749.403 |
| TS(D5-D7)                         | -516650.592 | -516891.516 | -516674.037 |
| D7                                | -516651.107 | -516892.126 | -516674.682 |
| D7*H2O                            | -518725.992 | -518969.323 | -518749.880 |
| TS(D7-C5)                         | -518725.752 | -518968.874 | -518749.546 |
| TS(D5-C5)                         | -518725.617 | -518968.809 | -518749.434 |
| TS(D5-D8)                         | -518725.708 | -518968.877 | -518749.490 |
| D8                                | -518726.122 | -518969.007 | -518749.968 |
| TS(D8-E1)                         | -518725.956 | -518968.923 | -518749.796 |
| TS(D5-D6)                         | -516650.128 | -516890.863 | -516673.624 |
| D6                                | -516650.057 | -516890.970 | -516673.592 |
| TS(D6-D4)                         | -516649.895 | -516890.872 | -516673.403 |
| ZOH*Diketene                      | -516650.523 | -516891.789 | -516674.125 |
| TS(C2-D1)                         | -516649.145 | -516890.231 | -516672.616 |
| D1                                | -516650.062 | -516890.844 | -516673.522 |
| TS(D1-D4)                         | -516650.065 | -516890.879 | -516673.523 |
| ZOH*Diketene*H2O                  | -518725.491 | -518969.059 | -518749.402 |
| TS(D4-D3)                         | -518725.022 | -518968.342 | -518748.798 |
| ZOH*3-hydroxy-but-2-enoic-acid    | -518726.383 | -518969.882 | -518750.306 |
| TS(D1-D2)                         | -516649.948 | -516890.948 | -516673.442 |
| D2                                | -516650.070 | -516891.036 | -516673.637 |
| D2*H2O                            | -518725.383 | -518968.750 | -518749.266 |
| TS(D2-D3)                         | -518725.291 | -518968.537 | -518749.132 |
| TS(D2-E1)                         | -518726.031 | -518969.394 | -518749.839 |

|                     |             |             |             |
|---------------------|-------------|-------------|-------------|
| TS(DAA_dehydration) | -518847.745 | -519091.436 | -518872.812 |
| (101)               |             |             |             |
| Z(101)              | -731929.590 | -732282.107 | -731960.239 |
| Z*AcOH              | -738148.797 | -738507.410 | -738180.660 |
| Z*Ketene            | -736071.488 | -736427.900 | -736103.058 |
| Z*Diketene          | -740214.065 | -740574.414 | -740246.446 |
| Z*E1                | -742290.998 | -742653.397 | -742323.707 |
| Z*Acetone           | -737171.770 | -737529.507 | -737204.064 |
| Z*Mesityl_oxide     | -740337.816 | -740698.459 | -740371.301 |
| TS(C2-D1)           | -740212.767 | -740573.078 | -740245.128 |
| TS(D1-D3)           | -742288.737 | -742651.344 | -742321.320 |
| TS(D4-D3)           | -742289.014 | -742651.473 | -742321.624 |
| TS(A1-E1)           | -742289.390 | -742651.887 | -742321.987 |
| TS(B1-B2)           | -744364.594 | -744729.523 | -744397.593 |
| TS(E1-E2)           | -742290.439 | -742652.796 | -742323.023 |
| TS(E4-E6*)          | -742412.103 | -742775.126 | -742445.887 |
| TS(E7*-E8)          | -742411.253 | -742774.287 | -742445.047 |
| TS(E7-E8)           | -742412.021 | -742775.058 | -742445.802 |
| TS(E8*-E10)         | -742410.478 | -742773.509 | -742444.243 |

Table S8. Harmonic Frequencies in  $\text{cm}^{-1}$ .

| System                     | Frequencies                                                                                                                                                                                                                                                                                                                                                     |
|----------------------------|-----------------------------------------------------------------------------------------------------------------------------------------------------------------------------------------------------------------------------------------------------------------------------------------------------------------------------------------------------------------|
| Gas phase                  |                                                                                                                                                                                                                                                                                                                                                                 |
| Acetic_acid                | 35.7i, 30.2i, 22.6i, 14.1i, 21.3, 55.1, 76.3, 410.9, 528.1, 563.3, 652.0, 842.6, 955.1, 1018.9, 1150.7, 1287.7, 1351.8, 1414.6, 1419.1, 1761.9, 2985.8, 3051.1, 3101.5, 3615.7                                                                                                                                                                                  |
| H2O                        | 1579.0, 3697.3, 3812.2                                                                                                                                                                                                                                                                                                                                          |
| Ethene-1_1-diol            | 43.7i, 32.8i, 3.6i, 68.3, 78.5, 94.0, 246.6, 440.4, 450.9, 529.4, 631.0, 639.2, 665.7, 926.3, 941.0, 1105.4, 1200.0, 1396.3, 1404.1, 1661.2, 3098.0, 3185.8, 3728.9, 3730.6                                                                                                                                                                                     |
| 3_3-dihydroxybutanoic_acid | 29.7i, 16.7i, 5.4i, 32.4, 47.5, 59.9, 90.2, 106.7, 183.3, 234.1, 284.5, 319.9, 335.9, 385.5, 420.0, 469.4, 504.5, 541.1, 574.6, 607.3, 679.5, 804.0, 838.5, 865.7, 919.5, 931.2, 1041.6, 1054.6, 1089.6, 1149.7, 1213.0, 1265.6, 1276.0, 1312.0, 1348.1, 1393.1, 1401.0, 1431.7, 1440.6, 1777.3, 2976.1, 2997.5, 3052.1, 3066.4, 3071.6, 3600.1, 3618.4, 3685.1 |
| 3-hydroxybut-2-enoic_acid  | 32.3i, 6.9i, 3.2i, 31.3, 51.7, 68.7, 115.0, 145.3, 180.3, 238.2, 368.0, 407.5, 500.0, 526.9, 563.0, 626.1, 702.0, 759.9, 803.5, 844.1, 927.3, 991.7, 1017.0, 1090.5, 1174.8, 1262.0, 1331.6, 1348.8, 1412.8, 1415.2, 1436.1, 1623.0, 1738.5, 2972.5, 3030.5, 3080.9, 3150.4, 3393.6, 3639.6                                                                     |
| Ketene                     | 29.1i, 24.0i, 1.6i, 69.1, 73.7, 80.3, 418.5, 500.6, 558.9, 937.9, 1138.4, 1347.8, 2175.4, 3108.8, 3201.2                                                                                                                                                                                                                                                        |
| 3-hydroxybut-3-enoic_acid  | 22.7i, 5.5i, 4.1i, 15.8, 52.4, 59.6, 83.5, 90.2, 200.7, 350.2, 403.3, 458.9, 473.4, 511.0, 541.3, 604.6, 697.8, 708.2, 801.8, 847.2, 873.5, 923.0, 952.5, 1071.8, 1175.7, 1219.3, 1252.3, 1288.0, 1303.9, 1386.0, 1399.8, 1681.3, 1783.3, 2952.1, 3079.0, 3097.3, 3192.8, 3607.4, 3619.0                                                                        |
| Diketene                   | 35.2i, 26.5i, 9.3i, 40.0, 66.1, 79.2, 147.1, 311.2, 444.3, 489.9, 511.9, 655.3, 707.2, 795.9, 816.7, 859.7, 937.6, 962.6, 983.1, 1072.3, 1154.5, 1219.2, 1365.5, 1383.0, 1714.8, 1897.8, 3009.9, 3062.4, 3099.7, 3192.1                                                                                                                                         |
| Acetylketene               | 31.5i, 20.3i, 8.4i, 53.1, 63.5, 66.7, 86.6, 114.6, 141.3, 346.7, 447.1, 508.8, 543.1, 593.9, 625.6, 864.0, 932.9, 991.4, 1085.9, 1134.1, 1315.7, 1353.2, 1410.7, 1416.9, 1679.3, 2174.2, 2965.3, 3031.5, 3085.9, 3127.4                                                                                                                                         |
| CO2                        | 31.7i, 6.4i, 1.2i, 44.0, 58.4, 632.1, 633.4, 1318.3, 2365.7                                                                                                                                                                                                                                                                                                     |
| 3-oxobutanoic_acid         | 18.4i, 13.2i, 9.8i, 32.2, 45.0, 59.8, 68.5, 105.3, 124.5, 251.0, 351.4, 390.5, 442.9, 550.5, 559.7, 667.7, 801.3, 840.6, 874.7, 887.3, 955.4, 998.7, 1146.1, 1149.3, 1199.7, 1291.6, 1335.9, 1362.0, 1401.2, 1412.4, 1414.3, 1682.3, 1782.3, 2954.6, 2963.7, 3025.7, 3038.5, 3086.0, 3120.2                                                                     |
| Propen-2-ol                | 23.4i, 21.6i, 8.6i, 24.6, 43.1, 65.0, 193.8, 275.0, 406.5, 460.2, 485.2, 707.3, 792.4, 840.9, 942.9, 984.8, 1025.8, 1193.2, 1280.2, 1354.5, 1384.0, 1423.8, 1431.2, 1689.4, 2942.5, 2993.4, 3063.0, 3096.0, 3190.6, 3720.2                                                                                                                                      |
| Mesityl_oxide              | 36.5i, 23.6i, 14.1i, 3.4i, 23.9, 37.1, 59.8, 78.9, 115.7, 133.0, 192.6, 209.7, 332.9, 369.0, 432.5, 452.5, 577.3, 613.2, 815.4, 816.5, 894.5, 927.1, 938.0, 959.5, 993.2, 1055.4, 1057.4, 1153.4, 1214.1, 1318.2, 1328.8, 1350.4, 1364.5,                                                                                                                       |

|                                        |                                                                                                                                                                                                                                                                                                                                                                                                                                                             |
|----------------------------------------|-------------------------------------------------------------------------------------------------------------------------------------------------------------------------------------------------------------------------------------------------------------------------------------------------------------------------------------------------------------------------------------------------------------------------------------------------------------|
|                                        | 1401.9, 1409.2, 1412.2, 1416.3, 1429.0, 1443.2, 1611.3, 1683.5, 2942.4, 2948.1, 2958.1, 2990.5, 2997.3, 3020.0, 3048.8, 3058.7, 3081.8, 3090.8                                                                                                                                                                                                                                                                                                              |
| <b>Acetone</b>                         | 39.0i, 22.6i, 17.2i, 27.9, 43.9, 62.0, 77.5, 132.2, 371.8, 472.7, 523.1, 775.6, 841.4, 853.4, 1041.2, 1068.7, 1197.8, 1324.8, 1329.1, 1401.3, 1405.5, 1413.7, 1429.8, 1725.9, 2958.6, 2965.1, 3020.8, 3027.0, 3079.7, 3081.3                                                                                                                                                                                                                                |
| <b>(Z)-4-methylpent-2-ene-2,4-diol</b> | 21.7i, 7.8i, 3.3i, 47.9, 52.6, 70.6, 81.8, 133.3, 175.5, 229.0, 246.0, 276.0, 285.3, 311.2, 349.1, 370.2, 411.1, 451.5, 467.8, 580.5, 599.3, 708.7, 761.5, 779.1, 873.3, 891.1, 905.9, 942.4, 978.9, 1001.5, 1019.3, 1091.2, 1119.9, 1157.4, 1188.5, 1290.5, 1334.8, 1340.0, 1349.6, 1357.6, 1406.2, 1413.8, 1420.2, 1426.8, 1431.6, 1442.1, 1451.7, 1673.5, 2940.6, 2959.2, 2961.8, 3016.6, 3021.9, 3031.7, 3051.9, 3057.2, 3068.2, 3112.7, 3367.1, 3692.3 |
| <b>Isobutene</b>                       | 48.7i, 25.9i, 4.2i, 20.3, 26.7, 52.9, 167.9, 203.7, 375.4, 426.3, 428.3, 676.4, 809.8, 872.3, 929.1, 957.6, 979.8, 1045.7, 1058.8, 1259.6, 1353.1, 1355.2, 1388.4, 1412.1, 1425.4, 1431.6, 1446.2, 1665.0, 2940.5, 2945.3, 2990.8, 2992.0, 3043.5, 3045.2, 3056.3, 3139.5                                                                                                                                                                                   |
| <b>TS(C2-D4)_gas</b>                   | 360.9i, 26.8i, 13.5i, 8.8i, 38.8, 52.4, 63.9, 120.6, 222.7, 368.4, 399.9, 464.6, 493.3, 589.6, 642.0, 686.3, 845.1, 937.1, 981.2, 1013.6, 1042.3, 1161.9, 1359.4, 1396.0, 1665.0, 2149.6, 2962.5, 3061.0, 3091.9, 3192.2                                                                                                                                                                                                                                    |
| <b>TS(C3-C4)_gas</b>                   | 63.1i, 20.8i, 18.9i, 3.6i, 46.8, 64.6, 67.5, 72.1, 91.1, 127.5, 187.7, 236.6, 242.5, 370.2, 402.6, 438.8, 525.8, 535.5, 610.1, 627.5, 730.0, 869.3, 943.9, 994.5, 1108.7, 1138.1, 1323.8, 1395.9, 1413.3, 1419.7, 1588.1, 1646.8, 2158.2, 2966.6, 3031.1, 3084.4, 3087.3, 3309.0, 3764.8                                                                                                                                                                    |
| <b>Bulk</b>                            |                                                                                                                                                                                                                                                                                                                                                                                                                                                             |
| <b>ZOH</b>                             | 184.8, 192.9, 207.8, 233.7, 240.4, 272.8, 308.9, 322.6, 333.6, 351.5, 368.2, 381.5, 498.7, 598.7, 627.3, 636.9, 652.1, 666.4, 673.5, 687.8, 689.1, 722.0, 739.0, 745.4, 772.4, 1048.8, 1096.7, 1125.2, 1196.7, 3656.8                                                                                                                                                                                                                                       |
| <b>ZOH*H2O</b>                         | 64.1, 124.1, 180.0, 199.8, 206.3, 222.4, 247.1, 256.6, 288.2, 315.9, 319.7, 333.0, 351.8, 358.4, 385.8, 451.6, 554.6, 606.8, 622.8, 630.4, 639.3, 645.0, 654.1, 668.9, 682.7, 693.4, 707.7, 732.4, 736.5, 859.7, 957.8, 1085.5, 1139.6, 1174.5, 1428.5, 1562.2, 2218.5, 3488.9, 3734.5                                                                                                                                                                      |
| <b>ZOH*AcOH</b>                        | 38.4, 58.7, 66.2, 94.1, 121.0, 128.6, 157.7, 202.2, 221.4, 238.2, 244.6, 259.6, 299.8, 322.1, 336.8, 351.6, 372.1, 401.5, 489.6, 566.9, 583.2, 611.6, 634.7, 649.0, 655.5, 662.1, 666.9, 672.5, 686.7, 692.3, 706.0, 722.9, 739.8, 865.1, 912.4, 977.2, 1007.4, 1021.9, 1049.4, 1100.7, 1124.9, 1152.6, 1291.8, 1334.1, 1364.8, 1401.7, 1417.8, 1444.7, 1546.5, 1755.3, 2771.4, 2985.8, 3058.8, 3102.4                                                      |
| <b>TS(A1-A2_o1_pos1)</b>               | 141.2i, 37.2, 82.3, 95.2, 128.4, 168.1, 179.8, 198.0, 218.0, 226.5, 233.8, 244.7, 253.7, 264.2, 305.6, 321.5, 338.5, 345.0, 372.5, 378.4, 407.1, 427.3, 444.9, 494.6, 557.0, 626.5, 636.8, 647.0, 648.7, 656.3, 662.8, 671.6, 681.2, 692.4, 706.6, 715.9, 742.5, 879.9, 923.5, 984.8, 1006.4, 1082.8, 1107.1, 1149.8, 1323.6, 1363.6, 1396.4, 1601.4, 2074.7, 2983.4, 3067.5, 3107.0, 3415.8, 3710.5                                                        |
| <b>TS(A1-A2_o1_pos2)</b>               | 118.8i, 60.7, 76.2, 83.4, 115.1, 142.0, 170.9, 199.5, 217.0, 218.3, 235.2, 240.3, 250.1, 257.1, 301.8, 308.0, 328.4, 341.3, 351.0, 366.9, 384.0, 395.7, 426.9, 458.1, 556.7, 627.6, 633.1, 642.1, 646.5, 658.3, 663.9, 667.8, 680.7, 694.4, 703.3, 712.2, 737.1, 904.3, 940.1, 977.4, 1002.2, 1082.1, 1102.5, 1145.8, 1326.9, 1351.2, 1389.3, 1607.0, 2172.3, 2944.2, 3037.4, 3090.6, 3400.7, 3727.0                                                        |
| <b>TS(A1-A2_o3)</b>                    | 57.4i, 37.2, 80.0, 99.4, 104.2, 125.8, 164.9, 180.2, 192.0, 207.2, 219.5, 239.7, 253.7, 260.4, 311.6, 323.3, 336.7, 339.9, 373.1, 375.4, 397.3, 425.7, 438.9, 464.2, 538.9, 562.2, 624.0, 636.3, 642.2, 647.9, 653.1, 676.5, 682.3, 685.2, 695.9, 714.3, 734.6, 872.1, 930.3, 997.9, 1026.7, 1028.2, 1054.4, 1151.0, 1321.6, 1375.6, 1405.5, 1606.7, 2055.9, 2970.3, 3051.9, 3090.8, 3563.0, 3708.5                                                         |
| <b>A2_o1_is*H2O</b>                    | 52.1, 58.2, 81.8, 100.5, 123.5, 131.0, 149.6, 160.7, 190.3, 204.9, 231.3, 242.5, 251.9, 257.6, 271.6, 286.2, 320.5, 332.1, 342.1, 357.7, 406.1, 453.0, 480.3, 534.6, 538.1, 584.7, 615.0, 636.0, 650.1, 657.2, 663.8, 669.3, 691.4, 698.2, 713.6, 724.4, 742.4, 756.3, 962.5, 1014.9, 1074.6, 1094.8, 1113.8, 1162.5, 1334.4, 1388.3, 1408.2, 1590.3, 1880.0, 2992.5, 3071.7, 3117.0, 3609.7, 3760.7                                                        |
| <b>A2_o1_os*H2O</b>                    | 43.6, 61.5, 66.8, 91.2, 110.1, 142.5, 156.3, 175.5, 197.4, 211.4, 236.9, 243.0, 251.0, 257.1, 268.9, 313.6, 330.9, 346.4, 353.9, 366.6, 411.3, 451.7, 457.8, 531.2, 548.3, 583.1, 615.8, 641.5, 650.0, 655.1, 664.2, 667.1, 692.5, 702.6, 712.7, 725.7, 738.6, 780.2, 960.4, 1017.7, 1074.4, 1094.9, 1112.1, 1170.5, 1347.8, 1399.1, 1416.7, 1596.2, 1903.8, 2931.7, 3022.3, 3091.3, 3625.7, 3737.1                                                         |
| <b>A2_o3_is*H2O</b>                    | 26.0, 40.1, 87.5, 89.7, 104.2, 115.1, 137.7, 158.4, 179.4, 204.8, 214.1, 234.1, 257.7, 259.5, 293.0, 305.8, 324.6, 343.4, 362.5, 364.8, 394.1, 410.7, 463.8, 513.4, 521.9, 581.4, 620.8, 641.5, 646.7, 656.6, 662.2, 679.5, 686.1, 689.2, 720.2, 733.1, 748.3, 801.6, 951.1, 1019.5, 1045.6, 1057.7, 1073.6, 1143.8, 1339.6, 1396.0, 1408.4, 1599.7, 1936.1, 2982.3, 3055.5, 3099.5, 3632.3, 3752.7                                                         |
| <b>A2_o1_is</b>                        | 58.6, 83.1, 113.2, 157.6, 169.4, 176.2, 201.0, 234.8, 245.6, 250.2, 260.4, 315.9, 331.6, 343.9, 356.1, 401.5, 471.2, 529.3, 568.3, 585.2, 618.9, 627.8, 640.6, 645.4, 667.7, 670.0, 685.7, 702.6, 714.6, 734.7, 740.3, 779.1, 958.0, 1023.3, 1076.8, 1089.9, 1137.3, 1172.6, 1340.2, 1402.8, 1409.2, 1893.9, 2985.4, 3060.1, 3100.7                                                                                                                         |
| <b>A2_o1_os</b>                        | 46.3, 78.9, 105.7, 149.5, 158.5, 178.0, 205.5, 238.9, 247.3, 253.4, 265.5, 315.5, 333.0, 347.0, 360.7, 416.5, 440.4, 533.2, 575.1, 586.7, 624.0, 633.2, 647.2, 649.9, 663.3, 670.3, 688.9, 708.3, 718.0, 737.9, 739.0, 774.9, 957.1, 1024.1, 1077.4, 1087.7, 1130.2, 1164.6, 1338.1, 1402.6, 1412.0, 1887.1, 2986.9, 3058.9, 3101.7                                                                                                                         |
| <b>A2_o3_is</b>                        | 47.4, 92.0, 104.9, 139.1, 164.9, 180.3, 205.1, 211.2, 236.3, 258.0, 302.7, 327.7, 342.0, 357.2, 368.9, 401.9, 460.8, 517.5, 531.6, 582.5, 619.7, 636.9, 642.5, 652.2, 664.2, 677.1, 684.6, 686.7, 722.8, 730.8, 752.8, 804.0, 953.2, 1019.8, 1052.7, 1068.4, 1097.1, 1144.9, 1341.5, 1396.0, 1406.1, 1929.4, 2983.0, 3055.9, 3101.5                                                                                                                         |
| <b>TS(A2_o1_pos2-A3)</b>               | 81.5i, 35.0, 58.7, 106.2, 134.8, 186.6, 269.7, 317.9, 334.4, 363.1, 376.5, 560.0, 583.2, 628.6, 659.6, 684.8, 923.8, 957.7, 985.4, 1025.5, 1272.8, 1312.2, 1342.3, 2266.1, 2771.8, 2997.2, 3059.3                                                                                                                                                                                                                                                           |
| <b>TS(A2_o3-pos1-A3)</b>               | 8.4i, 45.0, 82.0, 139.3, 168.9, 190.8, 210.2, 218.0, 253.6, 277.3, 300.9, 320.3, 335.7, 347.4, 358.0, 374.5, 393.2, 398.0, 422.1, 560.0, 630.3, 633.6, 640.6, 644.4, 656.7, 662.0, 668.9, 676.3, 684.3, 703.6, 723.7, 940.8, 976.6, 993.0, 1039.0, 1056.9, 1077.9, 1127.8, 1304.8, 1322.2, 1331.2, 2219.5, 2449.2, 2951.7, 3051.1                                                                                                                           |

|                                      |                                                                                                                                                                                                                                                                                                                                                                                                                                                                                                                       |
|--------------------------------------|-----------------------------------------------------------------------------------------------------------------------------------------------------------------------------------------------------------------------------------------------------------------------------------------------------------------------------------------------------------------------------------------------------------------------------------------------------------------------------------------------------------------------|
| <b>A3</b>                            | 32.0, 58.2, 75.5, 145.9, 169.9, 191.0, 206.9, 214.2, 251.4, 281.7, 299.9, 322.5, 334.6, 342.8, 359.8, 376.9, 396.8, 414.2, 451.4, 559.1, 629.4, 633.0, 639.8, 642.9, 657.6, 659.6, 669.9, 676.3, 683.9, 703.9, 724.2, 928.3, 989.6, 1001.4, 1021.8, 1058.5, 1091.3, 1137.7, 1310.3, 1321.7, 1325.6, 2161.0, 2328.5, 2952.7, 3041.5                                                                                                                                                                                    |
| <b>TS(A3-C3)</b>                     | 687.0i, 29.8, 65.2, 86.6, 134.1, 187.4, 197.3, 207.4, 246.6, 261.6, 264.4, 311.0, 333.6, 344.9, 362.7, 373.1, 387.3, 484.6, 524.2, 547.1, 584.9, 625.8, 638.8, 647.0, 656.1, 664.2, 679.4, 684.1, 686.1, 706.0, 717.9, 740.5, 879.6, 934.8, 1011.5, 1071.2, 1073.4, 1090.5, 1143.1, 1225.5, 1328.3, 1391.9, 2222.1, 2984.4, 3082.8                                                                                                                                                                                    |
| <b>ZOH*Ketene</b>                    | 42.1, 54.0, 67.6, 95.8, 144.9, 195.7, 198.1, 209.7, 223.7, 241.2, 248.4, 286.5, 319.2, 332.6, 349.3, 350.9, 390.9, 407.9, 514.1, 541.2, 602.6, 606.2, 630.0, 636.3, 643.3, 661.5, 669.0, 687.5, 695.5, 714.5, 720.4, 739.6, 748.8, 815.5, 922.7, 1088.0, 1134.0, 1138.9, 1165.4, 1200.1, 1338.8, 2151.3, 3088.4, 3128.3, 3185.2                                                                                                                                                                                       |
| <b>ZOH*2xKetene</b>                  | 41.2, 55.7, 61.4, 65.7, 78.0, 83.4, 106.7, 111.9, 140.6, 171.1, 196.8, 197.4, 204.1, 215.6, 242.3, 246.8, 276.1, 285.6, 321.2, 331.4, 348.2, 351.3, 391.5, 421.2, 424.1, 515.3, 518.3, 548.1, 592.2, 605.2, 627.6, 635.2, 639.4, 643.5, 657.2, 665.7, 684.5, 699.7, 709.0, 720.7, 741.4, 752.7, 822.1, 924.6, 935.8, 1091.0, 1136.0, 1141.5, 1144.2, 1170.3, 1211.7, 1340.8, 1346.9, 2135.3, 2168.4, 3048.9, 3078.2, 3090.7, 3173.9, 3186.2                                                                           |
| <b>ZOH*AcOH*Ketene</b>               | 40.6, 64.1, 66.2, 73.8, 83.2, 88.0, 103.1, 123.9, 140.7, 146.8, 152.2, 194.7, 211.9, 214.3, 215.7, 242.9, 252.3, 263.5, 300.2, 325.8, 342.7, 358.9, 399.5, 414.6, 420.2, 474.5, 515.7, 545.6, 576.3, 593.3, 601.3, 621.8, 630.8, 644.0, 657.9, 661.5, 665.3, 679.1, 685.6, 697.6, 712.9, 733.7, 907.7, 912.5, 931.7, 990.1, 1006.0, 1021.3, 1102.1, 1121.5, 1141.7, 1157.7, 1173.9, 1327.0, 1342.6, 1345.3, 1354.1, 1399.9, 1417.0, 1497.9, 1577.8, 1762.8, 2166.1, 2251.7, 3000.5, 3066.8, 3095.5, 3116.4, 3188.8    |
| <b>TS(C2-C3)</b>                     | 742.3i, 14.3, 27.7, 42.2, 56.0, 63.5, 82.6, 91.6, 106.6, 155.0, 186.0, 204.1, 211.7, 235.8, 253.5, 267.3, 280.9, 302.5, 320.0, 344.0, 356.9, 362.9, 363.3, 422.9, 481.5, 513.1, 527.8, 560.0, 577.8, 611.2, 629.2, 640.6, 645.4, 650.4, 657.9, 676.5, 684.3, 686.2, 705.1, 719.4, 732.2, 877.5, 916.5, 943.2, 998.7, 1065.8, 1084.9, 1114.9, 1138.0, 1165.6, 1231.0, 1327.1, 1341.8, 1377.6, 2165.1, 2209.2, 2989.8, 3066.4, 3073.3, 3175.0                                                                           |
| <b>ZOH*Acetylketene</b>              | 37.8, 42.3, 53.8, 67.8, 87.1, 118.4, 125.9, 150.6, 165.7, 196.7, 204.5, 237.2, 243.3, 259.1, 307.0, 323.5, 336.0, 351.8, 356.8, 377.0, 407.2, 502.3, 517.6, 552.6, 584.1, 615.4, 632.8, 640.4, 645.2, 657.5, 660.1, 666.9, 681.0, 684.8, 691.0, 712.2, 730.6, 736.2, 835.8, 860.5, 994.3, 1006.6, 1073.0, 1099.5, 1116.7, 1146.3, 1151.8, 1258.0, 1343.2, 1376.5, 1403.1, 1445.4, 1446.0, 1473.5, 1742.9, 2188.0, 2966.7, 3035.2, 3067.3, 3100.6                                                                      |
| <b>TS(C3-C4)_catalyzed</b>           | 75.2i, 42.4, 49.6, 82.4, 90.6, 99.4, 135.1, 139.4, 156.0, 177.0, 194.6, 206.5, 218.0, 237.2, 244.7, 269.7, 283.9, 315.3, 325.4, 339.6, 357.6, 385.8, 398.6, 407.6, 409.5, 420.3, 520.4, 550.0, 559.8, 585.6, 622.8, 632.6, 634.5, 635.1, 642.2, 646.8, 650.6, 654.6, 670.4, 678.2, 695.1, 697.9, 727.3, 737.6, 905.0, 950.7, 988.9, 1002.2, 1042.1, 1083.8, 1090.3, 1107.4, 1160.1, 1177.7, 1335.0, 1342.3, 1391.6, 1432.3, 1462.7, 1584.9, 1605.5, 2104.8, 2577.0, 2968.7, 3048.2, 3096.6, 3106.4, 3299.6, 3676.7    |
| <b>ZOH*3-hydroxybut-2-enoic acid</b> | 37.1, 40.3, 72.7, 90.8, 92.3, 113.5, 129.5, 147.4, 185.2, 197.6, 208.4, 228.8, 242.3, 267.5, 275.1, 311.4, 317.8, 335.8, 350.0, 356.1, 382.8, 388.6, 471.2, 540.9, 561.8, 571.0, 627.0, 636.4, 641.6, 653.0, 662.3, 673.7, 680.9, 685.4, 692.8, 697.0, 716.4, 720.8, 749.7, 793.9, 845.6, 862.6, 906.1, 931.2, 969.0, 1008.3, 1023.4, 1047.0, 1068.3, 1084.9, 1159.0, 1164.6, 1230.8, 1262.6, 1318.2, 1349.8, 1386.0, 1416.6, 1422.3, 1463.7, 1542.7, 1618.1, 1747.4, 2984.1, 2989.5, 3050.8, 3093.4, 3155.8, 3219.5  |
| <b>TS(C4-C5)</b>                     | 960.9i, 48.5, 59.9, 74.2, 79.0, 92.7, 102.4, 129.6, 163.9, 192.3, 206.6, 221.9, 234.4, 249.9, 263.9, 309.6, 322.4, 337.7, 356.5, 364.4, 371.3, 375.6, 435.2, 482.8, 537.0, 570.6, 594.9, 631.0, 635.6, 641.8, 654.8, 660.0, 670.9, 675.7, 679.6, 682.6, 693.5, 719.7, 721.5, 733.6, 758.1, 891.4, 921.6, 939.6, 952.8, 994.8, 1006.3, 1060.0, 1078.4, 1084.0, 1137.4, 1143.9, 1164.4, 1185.4, 1319.1, 1333.6, 1364.7, 1393.0, 1411.0, 1427.7, 1484.1, 1570.6, 1660.3, 2473.4, 2953.8, 3038.6, 3077.7, 3089.8, 3376.5  |
| <b>C5</b>                            | 41.3, 46.7, 51.6, 62.8, 73.4, 81.9, 145.1, 164.2, 173.1, 193.1, 208.1, 217.7, 246.7, 253.5, 305.1, 306.3, 327.9, 339.8, 361.8, 363.4, 387.8, 398.9, 436.3, 468.9, 531.0, 561.3, 573.3, 622.9, 627.9, 635.5, 638.9, 652.2, 658.0, 671.6, 675.9, 685.1, 694.4, 714.0, 722.0, 774.8, 812.6, 871.5, 898.5, 967.9, 1002.9, 1032.7, 1057.8, 1069.7, 1090.9, 1140.9, 1165.7, 1191.2, 1230.2, 1244.9, 1316.8, 1329.1, 1360.6, 1382.1, 1416.3, 1460.8, 1623.3, 1701.3, 1815.8, 2729.3, 2933.5, 3001.5, 3020.1, 3094.7, 3236.2  |
| <b>TS(C5-E1)</b>                     | 211.6i, 12.7, 51.0, 66.3, 75.8, 77.6, 87.0, 111.7, 132.9, 191.3, 201.9, 209.8, 222.9, 249.1, 266.4, 307.8, 329.0, 340.7, 351.7, 357.6, 365.9, 381.5, 391.7, 446.5, 502.7, 552.7, 558.7, 607.0, 627.6, 635.6, 638.9, 640.4, 648.6, 665.1, 672.3, 678.6, 682.1, 698.8, 707.9, 720.1, 736.5, 835.3, 875.0, 906.0, 970.5, 993.4, 1050.8, 1070.0, 1084.0, 1132.0, 1140.8, 1149.2, 1176.6, 1272.5, 1311.6, 1337.1, 1385.3, 1393.0, 1395.9, 1448.2, 1572.4, 1733.5, 2841.0, 2910.2, 2956.0, 3005.5, 3063.7, 3093.8, 3423.4   |
| <b>TS(C4-E1)</b>                     | 861.1i, 51.3, 56.3, 79.2, 100.6, 109.4, 116.6, 132.7, 141.2, 181.0, 194.8, 213.6, 220.8, 241.2, 258.3, 280.9, 316.7, 328.9, 346.1, 359.2, 362.9, 382.4, 421.4, 498.3, 535.4, 545.7, 573.8, 610.7, 629.2, 641.9, 647.7, 648.9, 655.2, 660.9, 670.0, 686.4, 688.2, 696.6, 703.3, 724.1, 740.3, 748.7, 853.2, 879.6, 931.7, 945.4, 998.0, 1014.1, 1074.0, 1091.4, 1102.1, 1151.4, 1172.2, 1189.5, 1259.0, 1334.1, 1349.8, 1367.8, 1395.5, 1430.1, 1488.8, 1503.6, 1721.9, 2964.6, 3038.6, 3078.4, 3129.7, 3171.1, 3570.0 |
| <b>TS(A1-E1)</b>                     | 223.4i, 31.8, 53.0, 63.3, 72.7, 100.7, 115.6, 143.9, 209.5, 215.3, 221.0, 224.3, 243.8, 257.4, 258.3, 305.6, 318.8, 330.8, 343.8, 359.1, 365.3, 392.5, 405.0, 415.7, 444.4, 506.8, 558.7, 590.5, 629.0, 639.8, 644.9, 652.2, 656.1, 659.8, 662.5, 674.4, 686.9, 691.3, 699.6, 723.6, 774.7, 798.4, 841.5, 872.0, 949.3, 967.7, 990.1, 1041.9, 1064.1, 1074.9, 1105.9, 1129.9, 1143.5, 1152.9, 1207.3, 1318.5, 1341.2, 1355.9, 1418.4, 1434.0, 1474.9, 2199.2, 2935.2, 2982.6, 2986.2, 3005.2, 3060.7, 3066.5, 3089.3  |
| <b>TS(A1-B1)</b>                     | 38.4, 58.7, 66.2, 94.1, 121.0, 128.6, 157.7, 202.2, 221.4, 238.2, 244.6, 259.6, 299.8, 322.1, 336.8, 351.6, 372.1, 401.5, 489.6, 566.9, 583.2, 611.6, 634.7, 649.0, 655.5, 662.1, 666.9, 672.5, 686.7, 692.3, 706.0, 722.9, 739.8, 865.1, 912.4, 977.2, 1007.4, 1021.9, 1049.4, 1100.7, 1124.9, 1152.6, 1291.8, 1334.1, 1364.8, 1401.7, 1417.8, 1444.7, 1546.5, 1755.3, 2771.4, 2985.8, 3058.8, 3102.4                                                                                                                |
| <b>ZOH*Ethene-1,1-diol</b>           | 15.2, 39.5, 50.5, 83.0, 120.8, 167.4, 192.3, 216.9, 221.3, 262.9, 276.0, 298.2, 305.7, 328.0, 345.8, 362.5, 386.4, 403.8, 449.6, 523.8, 545.4, 609.2, 618.4, 638.5, 649.8, 653.5, 668.2, 674.5, 681.0, 684.9, 690.1, 707.9, 725.5, 734.5,                                                                                                                                                                                                                                                                             |

|                                       |                                                                                                                                                                                                                                                                                                                                                                                                                                                                                                                                                                                           |
|---------------------------------------|-------------------------------------------------------------------------------------------------------------------------------------------------------------------------------------------------------------------------------------------------------------------------------------------------------------------------------------------------------------------------------------------------------------------------------------------------------------------------------------------------------------------------------------------------------------------------------------------|
|                                       | 749.8, 821.9, 850.5, 885.1, 930.9, 948.6, 1042.3, 1071.7, 1110.3, 1158.9, 1199.5, 1329.3, 1394.6, 1431.8, 1702.8, 2560.5, 3108.9, 3159.5, 3206.5, 3680.8                                                                                                                                                                                                                                                                                                                                                                                                                                  |
| <b>ZOH*AcOH*Ethene-1_1-diol</b>       | 41.1, 45.0, 58.3, 62.9, 68.5, 75.8, 81.6, 87.2, 95.8, 121.9, 135.8, 149.0, 163.9, 215.0, 218.6, 245.3, 258.1, 278.1, 309.0, 331.7, 352.8, 377.9, 393.4, 402.9, 412.6, 450.3, 467.1, 526.0, 544.5, 568.4, 598.4, 614.6, 626.9, 636.1, 645.3, 648.5, 654.1, 666.1, 674.6, 682.6, 693.1, 704.5, 706.4, 714.1, 735.5, 736.7, 911.1, 912.4, 924.1, 944.1, 954.7, 993.2, 1012.1, 1026.7, 1047.2, 1123.5, 1169.7, 1176.5, 1241.7, 1283.1, 1320.0, 1340.4, 1375.5, 1384.8, 1394.7, 1420.0, 1523.8, 1585.1, 1701.4, 1817.3, 2553.0, 2976.6, 3056.2, 3105.5, 3111.1, 3210.8, 3374.1, 3619.9         |
| <b>TS(B1-B2)</b>                      | 186.1i, 31.1, 45.6, 52.0, 79.2, 103.8, 118.7, 130.2, 139.2, 145.5, 214.8, 220.6, 236.2, 248.2, 254.2, 257.6, 266.0, 280.0, 314.3, 332.0, 355.4, 377.2, 395.6, 421.3, 433.6, 445.5, 476.0, 512.1, 554.6, 567.6, 588.9, 641.2, 643.2, 649.9, 654.6, 655.6, 664.1, 672.3, 679.8, 692.7, 697.2, 699.2, 729.8, 744.6, 813.8, 830.7, 870.5, 878.1, 923.0, 963.5, 982.3, 983.0, 997.9, 1005.9, 1011.0, 1054.3, 1116.7, 1173.6, 1222.4, 1260.4, 1321.4, 1348.1, 1372.0, 1401.9, 1420.6, 1440.7, 1458.9, 1524.3, 1604.6, 2856.2, 2896.1, 2951.1, 2970.6, 3058.7, 3103.8, 3108.3, 3204.4, 3634.6    |
| <b>ZOH*3_3-dihydroxybutanoic_acid</b> | 34.0, 45.8, 50.6, 81.7, 91.9, 99.0, 128.5, 158.7, 181.2, 208.3, 214.8, 232.0, 239.6, 252.5, 296.5, 307.7, 318.9, 322.9, 330.2, 355.7, 364.5, 390.7, 420.4, 429.7, 442.5, 466.8, 505.8, 521.3, 557.1, 576.4, 581.7, 632.5, 641.6, 645.8, 653.0, 659.0, 665.8, 670.5, 680.7, 683.4, 686.9, 698.4, 711.0, 730.1, 780.5, 843.8, 888.5, 911.7, 926.1, 936.5, 1018.0, 1053.6, 1066.7, 1072.8, 1103.6, 1137.9, 1156.2, 1184.3, 1225.5, 1251.8, 1293.3, 1317.0, 1345.6, 1415.9, 1430.3, 1439.8, 1471.3, 1478.7, 1570.3, 1749.9, 2979.3, 3011.2, 3058.0, 3076.2, 3079.5, 3359.9, 3387.0, 3646.2    |
| <b>TS(B2-E1)</b>                      | 1348.5i, 42.8, 48.2, 62.7, 72.7, 75.1, 87.9, 109.2, 138.6, 196.8, 204.0, 214.8, 220.7, 227.1, 247.3, 251.2, 293.6, 306.2, 309.7, 330.6, 334.4, 349.1, 359.9, 383.9, 390.9, 399.0, 433.3, 515.3, 530.7, 546.2, 588.1, 601.0, 642.4, 656.4, 660.1, 670.8, 677.6, 679.2, 687.5, 695.1, 708.4, 715.7, 726.7, 743.1, 757.0, 785.6, 798.5, 849.0, 896.5, 904.1, 954.7, 972.4, 1025.0, 1061.9, 1083.4, 1096.1, 1133.1, 1162.1, 1192.5, 1235.4, 1310.1, 1322.4, 1344.2, 1352.1, 1393.0, 1406.7, 1422.4, 1435.4, 1704.3, 2008.1, 2932.4, 2954.6, 2978.9, 3019.1, 3053.2, 3086.5, 3262.8, 3641.2    |
| <b>TS(B2-B3)</b>                      | 80.6i, 27.3, 53.9, 56.9, 80.8, 103.4, 114.3, 145.5, 177.6, 195.8, 206.2, 211.8, 228.8, 242.1, 253.7, 291.2, 304.7, 328.4, 334.4, 340.0, 359.5, 363.8, 382.7, 389.1, 403.9, 422.9, 460.2, 508.4, 549.2, 566.4, 569.9, 627.5, 634.9, 636.8, 639.4, 641.0, 649.7, 658.4, 669.1, 677.6, 694.1, 703.1, 713.4, 768.5, 841.2, 886.7, 912.8, 949.8, 958.5, 1022.6, 1049.0, 1065.7, 1083.3, 1088.7, 1124.5, 1148.8, 1166.2, 1222.4, 1238.0, 1271.2, 1293.2, 1361.1, 1380.0, 1382.4, 1391.8, 1432.5, 1439.8, 1496.4, 1610.1, 1928.7, 2876.1, 2937.5, 2986.5, 3047.2, 3071.8, 3078.4, 3477.9, 3665.3 |
| <b>B3</b>                             | 40.2, 50.8, 56.5, 75.5, 83.4, 99.8, 122.1, 155.5, 159.3, 193.4, 208.5, 210.3, 239.2, 241.7, 252.0, 273.7, 305.8, 325.5, 331.5, 338.6, 358.9, 366.3, 385.3, 386.1, 417.7, 449.2, 504.3, 539.6, 550.1, 565.3, 603.2, 615.4, 629.8, 634.6, 636.1, 639.0, 652.7, 659.4, 664.3, 676.2, 702.5, 704.5, 714.1, 784.5, 846.5, 892.8, 909.0, 929.4, 950.8, 1027.7, 1066.7, 1067.5, 1089.3, 1106.5, 1138.3, 1149.2, 1168.9, 1213.6, 1224.8, 1254.8, 1265.0, 1361.3, 1379.9, 1385.0, 1398.4, 1432.4, 1439.7, 1530.0, 1602.8, 2014.9, 2881.6, 2987.3, 3012.6, 3046.8, 3071.4, 3080.1, 3280.7, 3673.5   |
| <b>TS(B3-C5)</b>                      | 96.8i, 26.2, 38.1, 56.0, 83.2, 87.2, 107.4, 119.8, 195.1, 198.3, 205.2, 207.3, 210.4, 221.0, 238.2, 249.0, 260.2, 291.1, 304.9, 321.8, 336.7, 358.9, 362.3, 364.1, 386.4, 387.6, 405.2, 456.2, 528.4, 554.8, 559.3, 588.4, 624.4, 633.7, 635.8, 638.0, 642.4, 652.7, 664.4, 675.9, 679.2, 699.2, 703.0, 716.0, 764.0, 773.3, 842.8, 852.9, 886.9, 901.8, 981.9, 1001.0, 1058.8, 1087.6, 1105.2, 1118.3, 1162.9, 1178.8, 1226.1, 1254.8, 1345.3, 1354.0, 1365.9, 1368.6, 1414.9, 1440.4, 1458.0, 1514.0, 1704.8, 2939.9, 2969.1, 2976.5, 3043.0, 3088.1, 3222.5, 3305.8, 3356.2, 3585.3    |
| <b>C5*H2O</b>                         | 34.6, 42.9, 60.2, 68.9, 81.9, 94.6, 109.3, 122.5, 132.9, 140.2, 151.2, 176.5, 191.9, 208.4, 221.6, 242.3, 256.2, 277.3, 305.1, 317.6, 333.2, 342.8, 345.5, 362.8, 376.2, 406.0, 411.8, 428.9, 439.6, 540.6, 563.3, 577.7, 598.4, 631.2, 636.9, 640.9, 649.3, 660.2, 669.9, 684.3, 687.7, 704.9, 711.6, 725.8, 747.1, 828.2, 851.7, 868.4, 904.5, 961.9, 1012.3, 1017.6, 1062.7, 1096.3, 1109.6, 1165.6, 1175.3, 1178.1, 1214.7, 1307.5, 1323.5, 1350.7, 1359.0, 1399.8, 1406.2, 1442.9, 1535.4, 1609.5, 1641.5, 1727.3, 2388.8, 2869.7, 2950.4, 3001.1, 3015.1, 3093.3, 3552.2, 3705.2    |
| <b>B4_o1_pos1</b>                     | 27.5, 37.5, 51.8, 56.7, 68.9, 84.6, 90.2, 109.0, 125.3, 157.2, 159.4, 185.2, 220.7, 239.2, 246.6, 260.7, 264.4, 318.6, 334.2, 340.4, 383.1, 399.5, 407.2, 449.9, 466.5, 524.1, 540.9, 548.4, 583.7, 613.5, 614.5, 640.5, 649.1, 654.6, 668.6, 673.6, 684.3, 695.3, 696.3, 705.7, 721.1, 736.7, 742.9, 745.4, 758.4, 910.2, 943.6, 958.4, 1019.7, 1059.4, 1076.4, 1118.8, 1154.5, 1187.9, 1247.7, 1279.2, 1335.8, 1376.4, 1392.1, 1404.8, 1704.3, 1880.1, 2993.1, 3063.1, 3110.6, 3112.7, 3210.1, 3387.2, 3620.5                                                                           |
| <b>B4_o1_pos2</b>                     | 35.9, 46.5, 54.3, 57.9, 64.3, 79.8, 85.2, 118.0, 131.5, 155.1, 168.2, 181.0, 217.9, 240.6, 248.2, 255.5, 266.1, 317.3, 335.2, 348.3, 373.8, 406.8, 412.9, 450.1, 455.2, 523.1, 533.0, 551.8, 580.2, 608.2, 612.9, 632.8, 639.4, 650.8, 668.3, 671.0, 673.9, 694.1, 697.5, 707.1, 714.6, 732.5, 739.4, 744.3, 768.7, 911.4, 944.0, 956.0, 1016.4, 1064.4, 1078.4, 1107.5, 1152.9, 1187.0, 1237.1, 1271.7, 1342.0, 1376.3, 1403.8, 1407.8, 1705.3, 1897.9, 2985.2, 3054.7, 3100.3, 3112.2, 3211.9, 3403.1, 3617.7                                                                           |
| <b>B4_o3</b>                          | 23.3, 36.2, 53.8, 64.3, 78.2, 95.6, 107.4, 109.8, 110.9, 136.7, 164.3, 187.3, 212.4, 220.7, 245.4, 261.0, 306.9, 331.1, 345.6, 356.9, 384.4, 398.4, 430.9, 449.1, 469.2, 513.2, 523.0, 529.4, 578.7, 613.1, 617.4, 643.3, 650.1, 653.3, 664.9, 671.9, 676.5, 689.9, 696.0, 711.2, 716.8, 727.6, 744.8, 748.1, 800.6, 912.9, 942.2, 951.3, 1020.4, 1039.0, 1060.3, 1070.1, 1112.5, 1191.0, 1237.4, 1286.9, 1341.4, 1373.9, 1395.5, 1404.2, 1704.8, 1936.5, 2981.9, 3052.1, 3100.5, 3112.5, 3211.9, 3398.9, 3597.4                                                                          |
| <b>TS(B4-E1_o1_pos1)</b>              | 142.1i, 50.1, 61.6, 75.8, 82.6, 101.0, 122.2, 137.4, 143.9, 160.2, 179.0, 209.1, 210.3, 218.0, 236.0, 252.8, 271.7, 304.9, 312.3, 345.2, 346.7, 365.7, 385.7, 402.6, 429.0, 442.8, 506.6, 537.5, 557.0, 604.3, 632.8, 637.2, 637.5, 644.5, 653.9, 656.5, 668.5, 679.4, 680.2, 700.2, 712.7, 715.4, 732.0, 737.3, 907.1, 917.6, 924.0, 948.4, 975.9, 989.9, 1049.8, 1078.9, 1159.4, 1207.5, 1262.5, 1303.1, 1312.4, 1341.1, 1376.3, 1377.8, 1674.0, 2127.0, 2968.0, 3054.8, 3066.1, 3108.7, 3214.6, 3350.6, 3527.6                                                                         |
| <b>TS(B4-E1_o1_pos2)</b>              | 42.7i, 51.7, 58.2, 67.6, 85.9, 88.9, 111.1, 121.5, 133.2, 145.4, 198.1, 211.0, 223.2, 228.5, 243.5, 262.5, 268.7, 315.3, 321.8, 337.9, 357.5, 361.7, 383.6, 401.5, 406.9, 445.3, 538.5, 559.2, 609.4, 623.4, 630.2, 633.9, 640.9, 649.7, 652.2, 662.6, 667.2, 669.6, 680.4, 696.8, 714.6, 730.5, 745.0, 763.1, 899.2, 949.6, 950.0, 958.0, 986.8, 1011.1, 1045.7, 1088.7, 1152.6, 1219.0, 1256.7, 1307.4, 1322.7, 1330.1, 1364.8, 1383.4, 1682.6, 2241.0, 2680.5, 2961.7, 3017.5, 3109.8, 3210.9, 3274.7, 3398.6                                                                          |



|                                |                                                                                                                                                                                                                                                                                                                                                                                                                                                                                                                                                                                                                                                                                    |
|--------------------------------|------------------------------------------------------------------------------------------------------------------------------------------------------------------------------------------------------------------------------------------------------------------------------------------------------------------------------------------------------------------------------------------------------------------------------------------------------------------------------------------------------------------------------------------------------------------------------------------------------------------------------------------------------------------------------------|
| <b>TS(B4-E1_o3)</b>            | 77.5i, 47.8, 63.4, 71.8, 84.3, 95.9, 116.5, 129.4, 142.2, 161.3, 186.9, 203.1, 207.0, 219.4, 243.5, 252.7, 257.4, 261.9, 303.7, 313.0, 319.1, 329.4, 342.2, 364.8, 372.6, 377.0, 393.6, 396.3, 413.7, 421.3, 438.5, 446.0, 525.4, 550.9, 560.0, 621.2, 635.2, 635.6, 640.9, 645.4, 657.2, 665.8, 680.2, 682.5, 688.0, 695.0, 705.6, 712.4, 729.9, 734.9, 912.8, 919.2, 921.9, 948.6, 972.9, 990.2, 992.9, 1009.9, 1018.8, 1042.3, 1061.1, 1134.9, 1206.5, 1256.9, 1289.4, 1314.1, 1358.5, 1374.1, 1394.8, 1684.5, 2106.0, 2953.9, 3031.0, 3068.3, 3114.2, 3223.1, 3363.3, 3520.4                                                                                                   |
| <b>A2_o1_pos1*Ketene</b>       | 22.3, 46.9, 49.9, 61.4, 71.6, 85.6, 105.3, 107.6, 137.3, 150.1, 167.9, 175.4, 204.4, 235.0, 245.3, 251.8, 258.8, 315.9, 332.3, 345.4, 358.4, 400.9, 419.6, 468.3, 507.2, 532.5, 563.2, 572.4, 588.1, 627.2, 637.1, 641.5, 648.3, 660.4, 674.2, 688.9, 704.4, 719.0, 735.1, 737.6, 774.8, 937.4, 959.0, 1022.6, 1079.1, 1090.3, 1126.5, 1137.8, 1164.5, 1339.6, 1346.7, 1399.8, 1408.6, 1879.1, 2165.5, 2986.2, 3061.4, 3101.3, 3102.9, 3195.7                                                                                                                                                                                                                                      |
| <b>A2_o1_pos2*Ketene</b>       | 28.0, 32.1, 53.2, 57.3, 76.3, 79.6, 85.3, 116.8, 156.4, 161.6, 176.4, 181.4, 211.4, 240.6, 249.2, 252.5, 266.1, 318.5, 334.3, 347.6, 358.9, 416.1, 428.8, 443.0, 509.6, 533.7, 568.5, 572.8, 584.7, 622.3, 634.5, 646.7, 649.1, 664.4, 674.6, 689.1, 705.1, 716.8, 733.3, 737.5, 770.9, 942.0, 956.8, 1023.9, 1077.3, 1089.6, 1120.0, 1142.3, 1158.0, 1339.7, 1351.0, 1402.3, 1412.7, 1888.1, 2165.4, 2984.3, 3054.7, 3088.5, 3099.5, 3186.0                                                                                                                                                                                                                                       |
| <b>A2_o3*Ketene</b>            | 22.1, 38.8, 45.1, 58.6, 72.5, 94.1, 100.8, 117.3, 138.7, 163.9, 167.9, 185.0, 209.2, 215.1, 237.1, 257.7, 303.4, 326.5, 342.0, 360.8, 371.3, 405.9, 429.4, 462.2, 511.8, 521.3, 542.0, 582.7, 590.5, 620.8, 639.0, 644.2, 654.3, 662.5, 680.5, 684.7, 686.8, 723.7, 732.2, 748.6, 795.1, 932.1, 955.0, 1019.7, 1050.9, 1068.4, 1082.8, 1138.6, 1147.1, 1339.7, 1350.6, 1395.7, 1407.4, 1915.3, 2159.7, 2981.4, 3053.8, 3084.8, 3099.9, 3177.6                                                                                                                                                                                                                                      |
| <b>TS(A2-C3_o1_pos1)</b>       | 123.9i, 31.8, 46.9, 53.7, 62.8, 74.0, 86.4, 137.8, 169.0, 170.1, 205.6, 210.7, 219.9, 234.2, 253.9, 258.5, 294.5, 314.3, 330.0, 331.0, 350.8, 357.3, 362.6, 370.7, 409.7, 425.0, 532.4, 557.8, 629.2, 634.8, 644.8, 645.8, 649.0, 655.2, 656.6, 670.2, 682.1, 691.5, 710.6, 723.5, 908.9, 936.5, 944.6, 970.0, 987.6, 1096.3, 1097.8, 1135.8, 1148.6, 1300.4, 1331.5, 1336.4, 1364.0, 2155.8, 2177.9, 2938.0, 3022.2, 3033.9, 3062.0, 3158.4                                                                                                                                                                                                                                       |
| <b>TS(A2-C3_o1_pos2)</b>       | 82.9i, 30.2, 45.1, 56.5, 70.3, 83.9, 90.8, 106.2, 131.1, 173.0, 203.5, 209.6, 221.5, 242.0, 248.1, 253.5, 305.3, 311.6, 322.0, 329.4, 353.1, 360.1, 368.0, 386.9, 402.4, 432.1, 533.2, 561.2, 626.8, 632.6, 637.2, 646.7, 652.2, 659.3, 659.9, 666.4, 682.0, 692.2, 702.8, 721.4, 917.7, 941.4, 957.9, 976.6, 1000.7, 1091.2, 1095.1, 1136.2, 1149.5, 1313.0, 1339.2, 1343.9, 1355.3, 2160.5, 2239.2, 2878.5, 2995.0, 3031.1, 3043.2, 3147.0                                                                                                                                                                                                                                       |
| <b>TS(A2-D5_o3)</b>            | 110.9i, 25.2, 54.2, 59.6, 71.7, 105.3, 120.0, 144.0, 165.9, 181.2, 197.5, 212.7, 224.3, 242.0, 256.2, 270.8, 316.0, 319.6, 330.9, 345.6, 352.5, 370.3, 370.8, 390.7, 412.9, 429.2, 535.5, 556.1, 631.5, 635.3, 643.6, 648.0, 654.0, 664.7, 672.7, 678.1, 681.6, 683.0, 707.5, 723.0, 909.8, 932.2, 968.9, 977.1, 1007.5, 1047.8, 1065.1, 1121.9, 1141.4, 1312.2, 1340.5, 1349.2, 1379.6, 2149.2, 2163.4, 2891.7, 2989.6, 3047.2, 3058.0, 3156.7                                                                                                                                                                                                                                    |
| <b>TS(E1-E2)</b>               | 157.0i, 28.5, 48.7, 51.9, 71.5, 93.6, 107.7, 110.3, 124.2, 142.1, 155.4, 204.2, 208.1, 217.6, 242.8, 272.1, 287.0, 309.1, 316.2, 336.3, 355.6, 366.8, 388.8, 420.5, 498.1, 524.9, 550.8, 575.1, 605.5, 610.5, 640.3, 644.0, 653.1, 667.5, 675.2, 687.7, 696.8, 707.5, 719.0, 746.1, 788.2, 825.0, 841.9, 851.5, 872.8, 902.1, 968.2, 1007.9, 1019.2, 1056.1, 1076.4, 1158.0, 1224.7, 1240.1, 1267.7, 1341.0, 1379.5, 1412.9, 1421.0, 1440.2, 1568.6, 2073.3, 2694.3, 2967.4, 3035.1, 3078.2, 3082.9, 3172.3, 3261.1                                                                                                                                                                |
| <b>ZOH*Propen-2-ol*CO2</b>     | 31.6, 41.5, 49.2, 60.0, 65.2, 74.6, 82.3, 90.3, 104.2, 113.4, 126.7, 177.1, 190.9, 202.8, 212.9, 234.0, 260.6, 297.3, 313.5, 330.0, 353.2, 361.6, 392.5, 410.2, 481.3, 500.7, 531.1, 547.4, 565.0, 595.1, 609.4, 611.4, 635.6, 640.9, 651.0, 662.0, 680.0, 683.3, 697.5, 716.2, 718.8, 730.3, 747.8, 762.5, 801.8, 851.7, 953.7, 989.2, 1025.6, 1065.4, 1089.8, 1144.4, 1171.5, 1192.2, 1323.8, 1336.0, 1360.5, 1403.4, 1415.3, 1433.3, 1641.5, 2372.6, 2961.3, 3016.0, 3071.1, 3081.7, 3173.2, 3392.5, 3531.1                                                                                                                                                                     |
| <b>ZOH*Propen-2-ol</b>         | 57.5, 72.3, 87.5, 92.8, 121.3, 171.0, 199.9, 205.1, 213.1, 223.3, 241.7, 252.7, 299.5, 318.6, 333.3, 352.4, 354.8, 385.2, 416.0, 481.6, 495.8, 559.8, 614.5, 629.8, 638.5, 642.2, 659.2, 668.5, 682.4, 686.0, 688.0, 713.1, 731.1, 732.2, 739.6, 820.3, 824.4, 845.4, 934.9, 954.5, 989.6, 1031.9, 1085.8, 1129.2, 1169.1, 1186.7, 1286.8, 1363.6, 1392.0, 1419.7, 1420.7, 1441.0, 1680.0, 2402.5, 2968.2, 3028.2, 3076.3, 3094.9, 3184.2, 3428.6                                                                                                                                                                                                                                  |
| <b>TS(E2-E3)</b>               | 24.2i, 51.3, 70.1, 75.1, 82.0, 99.8, 184.7, 188.4, 200.7, 208.4, 226.6, 243.6, 301.7, 306.4, 328.5, 353.2, 362.4, 374.0, 405.4, 409.7, 482.7, 503.6, 528.2, 605.0, 640.8, 646.4, 653.1, 665.8, 668.5, 683.9, 689.1, 693.6, 709.1, 730.6, 733.1, 751.0, 765.5, 799.2, 855.9, 951.7, 987.5, 1026.9, 1031.0, 1070.6, 1088.5, 1136.0, 1200.0, 1336.7, 1358.4, 1405.3, 1414.0, 1433.9, 1642.4, 2962.1, 3020.6, 3071.3, 3089.8, 3180.1, 3477.9, 3609.9                                                                                                                                                                                                                                   |
| <b>ZOH*Acetone</b>             | 33.6, 53.0, 57.7, 93.7, 110.7, 117.5, 145.3, 155.3, 197.8, 211.0, 217.2, 239.2, 256.2, 288.1, 319.5, 331.1, 350.6, 360.5, 378.6, 400.2, 483.2, 535.6, 582.3, 625.4, 628.9, 632.4, 639.6, 659.7, 669.4, 678.9, 696.4, 702.4, 722.3, 739.7, 812.3, 849.1, 865.0, 885.6, 1050.8, 1071.1, 1078.9, 1122.7, 1138.7, 1169.5, 1248.9, 1330.2, 1346.1, 1389.4, 1396.0, 1400.0, 1412.0, 1432.5, 1601.5, 1894.3, 2963.2, 2970.5, 3023.6, 3032.0, 3101.4, 3101.8                                                                                                                                                                                                                               |
| <b>ZOH*Acetone*Propen-2-ol</b> | 34.9, 47.7, 55.9, 61.8, 65.1, 72.4, 77.7, 87.0, 95.8, 99.3, 114.4, 130.3, 138.5, 140.8, 189.3, 199.2, 208.5, 239.1, 251.7, 267.7, 308.4, 325.7, 332.6, 355.9, 370.2, 383.1, 407.8, 413.2, 467.1, 481.3, 507.9, 538.9, 587.2, 620.5, 636.5, 638.1, 640.7, 650.2, 660.6, 671.5, 682.8, 687.4, 716.2, 721.0, 725.5, 740.5, 780.4, 806.4, 853.7, 854.1, 860.8, 913.8, 953.1, 988.8, 1025.3, 1050.7, 1058.1, 1061.7, 1080.7, 1148.9, 1156.2, 1180.7, 1258.0, 1324.5, 1330.2, 1341.0, 1359.9, 1384.9, 1396.5, 1401.6, 1405.7, 1415.6, 1433.3, 1435.9, 1474.7, 1525.8, 1646.1, 1768.6, 2954.6, 2960.5, 2963.7, 3021.9, 3027.3, 3036.1, 3067.9, 3081.6, 3086.6, 3097.5, 3172.9, 3535.5     |
| <b>TS(E4-E5)</b>               | 44.7i, 37.3, 45.5, 51.6, 81.9, 85.3, 95.5, 111.0, 118.5, 136.0, 159.4, 190.4, 202.9, 209.9, 212.8, 218.9, 224.2, 247.2, 253.8, 267.1, 302.6, 324.4, 340.3, 356.5, 386.4, 390.1, 410.5, 421.9, 455.0, 497.4, 513.9, 544.2, 554.3, 630.7, 638.3, 645.4, 648.5, 653.6, 658.9, 667.2, 677.1, 689.9, 700.9, 722.3, 751.3, 797.4, 844.1, 860.7, 862.7, 878.6, 938.2, 952.8, 967.8, 998.7, 1016.0, 1019.9, 1043.8, 1044.3, 1123.1, 1139.9, 1160.6, 1205.1, 1233.0, 1330.7, 1341.5, 1343.2, 1367.8, 1375.0, 1388.3, 1401.6, 1411.4, 1418.9, 1431.0, 1432.1, 1436.0, 1504.4, 1592.2, 2409.7, 2938.6, 2956.6, 2964.6, 3021.0, 3031.6, 3044.6, 3072.5, 3088.6, 3101.0, 3103.4, 3200.3, 3211.5 |
| <b>E5</b>                      | 21.1, 33.9, 54.9, 58.4, 69.4, 82.1, 122.7, 132.8, 140.1, 179.5, 201.0, 211.4, 224.2, 248.2, 268.4, 276.2, 283.6, 300.5, 302.4, 323.9, 329.5, 331.3, 356.5, 368.7, 389.8, 414.5, 428.2, 451.7, 465.8, 493.0, 553.1, 568.7, 620.0, 627.0, 639.7, 647.4, 653.9, 659.3, 666.1, 668.7, 680.5, 689.9, 695.7, 711.9, 723.8, 810.0, 851.2, 869.5, 907.5, 937.7, 964.4, 971.0, 987.2, 998.5, 1007.2, 1099.4, 1110.1, 1117.9, 1138.8, 1146.9, 1186.2, 1239.6, 1251.1, 1323.9, 1336.9, 1342.0,                                                                                                                                                                                                |

|                                          |                                                                                                                                                                                                                                                                                                                                                                                                                                                                                                                                                                                                                                                                                       |
|------------------------------------------|---------------------------------------------------------------------------------------------------------------------------------------------------------------------------------------------------------------------------------------------------------------------------------------------------------------------------------------------------------------------------------------------------------------------------------------------------------------------------------------------------------------------------------------------------------------------------------------------------------------------------------------------------------------------------------------|
|                                          | 1359.1, 1371.2, 1384.6, 1400.2, 1415.4, 1422.6, 1434.3, 1440.4, 1444.7, 1457.5, 1552.9, 1665.1, 2952.6, 2970.0, 2975.4, 3007.9, 3031.5, 3047.9, 3051.1, 3058.6, 3062.8, 3085.3, 3087.4, 3432.2                                                                                                                                                                                                                                                                                                                                                                                                                                                                                        |
| <b>TS(E5-E6)</b>                         | 868.1i, 22.8, 47.3, 53.3, 74.3, 84.4, 104.5, 114.6, 125.0, 180.9, 195.5, 207.3, 226.5, 243.3, 262.2, 265.3, 275.7, 300.9, 309.0, 317.6, 326.8, 339.1, 353.2, 366.0, 370.5, 378.3, 393.5, 415.0, 447.5, 468.8, 514.0, 571.2, 604.1, 626.9, 632.6, 643.7, 648.5, 656.7, 663.6, 670.3, 680.7, 683.3, 697.3, 717.7, 734.2, 762.4, 860.4, 870.8, 903.8, 912.7, 936.7, 965.8, 976.9, 993.7, 1006.7, 1021.5, 1081.1, 1083.4, 1097.3, 1121.8, 1139.3, 1152.3, 1186.7, 1202.4, 1296.2, 1339.9, 1343.8, 1351.5, 1368.0, 1378.5, 1412.6, 1416.9, 1425.3, 1432.6, 1445.1, 1452.0, 1461.0, 1594.7, 2936.8, 2955.1, 2981.6, 2999.6, 3031.8, 3048.5, 3050.5, 3059.2, 3081.2, 3091.9, 3093.0, 3676.6  |
| <b>ZOH*Z-4-methylpent-2-ene-2-4-diol</b> | 43.1, 51.1, 64.0, 73.6, 74.9, 98.0, 104.8, 158.9, 181.9, 195.2, 207.9, 220.5, 233.1, 245.6, 252.9, 256.3, 295.3, 301.0, 312.0, 318.2, 335.2, 341.3, 358.3, 366.9, 373.8, 383.8, 395.8, 417.1, 456.7, 470.9, 550.4, 593.5, 602.3, 624.3, 633.6, 643.8, 650.3, 663.8, 673.0, 680.4, 683.5, 701.8, 726.5, 738.6, 749.1, 788.1, 819.4, 844.0, 857.7, 883.0, 907.9, 914.2, 949.6, 980.9, 1002.2, 1021.5, 1077.8, 1079.2, 1097.2, 1117.3, 1135.7, 1176.8, 1198.2, 1258.0, 1293.0, 1336.4, 1347.0, 1353.0, 1368.3, 1402.3, 1418.6, 1424.3, 1429.9, 1430.8, 1445.5, 1452.2, 1624.3, 2566.8, 2956.3, 2975.9, 2993.1, 3031.8, 3041.6, 3051.3, 3075.0, 3080.9, 3082.2, 3098.5, 3212.9, 3671.1    |
| <b>TS(E6-E7)</b>                         | 31.9i, 16.1, 50.6, 57.3, 66.9, 88.9, 96.7, 137.0, 183.9, 195.5, 206.7, 229.2, 233.3, 245.3, 245.9, 262.1, 279.9, 284.2, 307.9, 311.2, 325.9, 338.1, 347.6, 352.5, 367.0, 384.7, 404.9, 408.0, 450.7, 465.8, 527.0, 559.1, 587.3, 600.8, 609.8, 638.7, 642.1, 649.6, 656.0, 657.3, 685.0, 691.3, 715.0, 733.9, 736.9, 742.4, 782.1, 791.6, 862.0, 889.5, 905.1, 915.0, 936.2, 980.7, 985.5, 1000.1, 1079.9, 1091.8, 1096.1, 1112.2, 1136.2, 1171.3, 1175.3, 1202.4, 1304.6, 1326.7, 1340.0, 1349.2, 1359.8, 1396.5, 1412.8, 1423.5, 1425.3, 1441.8, 1449.6, 1459.1, 1676.0, 2928.5, 2957.2, 2964.9, 3001.4, 3036.6, 3038.1, 3045.7, 3048.3, 3087.6, 3101.1, 3205.1, 3479.2, 3566.9     |
| <b>E7</b>                                | 44.3, 58.7, 78.9, 89.3, 111.0, 123.5, 129.8, 159.4, 182.1, 201.4, 215.6, 231.8, 237.8, 241.1, 256.8, 263.8, 278.2, 304.3, 312.8, 327.2, 340.3, 352.7, 358.5, 370.1, 399.8, 404.2, 448.9, 450.7, 471.6, 540.8, 568.8, 600.4, 617.3, 631.1, 636.3, 637.1, 647.3, 652.8, 663.5, 668.6, 681.6, 698.5, 719.8, 730.5, 766.2, 799.2, 831.7, 891.8, 905.9, 908.2, 929.9, 983.3, 993.0, 1020.5, 1071.8, 1083.7, 1092.9, 1104.9, 1148.2, 1162.6, 1172.9, 1191.7, 1205.3, 1296.8, 1310.1, 1347.0, 1365.8, 1368.8, 1405.3, 1416.1, 1423.4, 1424.5, 1429.5, 1443.1, 1451.6, 1462.7, 1659.5, 1741.1, 1980.7, 2961.3, 2975.5, 2992.5, 3038.8, 3052.7, 3055.8, 3064.0, 3065.5, 3115.1, 3153.4, 3409.3 |
| <b>TS(E7-E8)</b>                         | 222.9i, 13.5, 46.3, 62.2, 73.1, 92.3, 98.5, 144.8, 156.3, 176.0, 195.9, 201.4, 206.6, 230.9, 235.0, 249.3, 256.1, 279.6, 298.4, 311.3, 313.0, 321.4, 337.7, 340.7, 358.7, 369.4, 399.5, 400.7, 413.0, 448.1, 466.4, 557.6, 583.5, 595.2, 627.2, 632.0, 633.4, 645.9, 647.2, 651.2, 661.3, 675.3, 687.6, 715.5, 721.1, 729.6, 774.0, 834.1, 892.9, 902.4, 931.8, 965.3, 974.0, 995.8, 1013.3, 1019.4, 1022.4, 1063.3, 1097.1, 1113.5, 1159.4, 1164.8, 1256.6, 1272.4, 1332.1, 1347.9, 1357.6, 1360.8, 1373.9, 1409.4, 1415.4, 1421.4, 1429.8, 1439.6, 1448.4, 1572.8, 1642.3, 2819.7, 2970.5, 2975.3, 2982.5, 3040.5, 3043.4, 3047.6, 3052.9, 3074.9, 3080.7, 3114.9, 3123.8, 3642.3   |
| <b>ZOH*MO</b>                            | 23.7, 49.5, 62.5, 75.2, 95.3, 119.1, 123.3, 140.3, 165.3, 183.4, 200.4, 206.0, 216.5, 224.9, 239.4, 250.8, 260.4, 309.8, 326.7, 342.2, 354.6, 358.8, 365.9, 379.1, 438.2, 468.5, 478.9, 544.3, 599.0, 616.7, 625.6, 630.5, 633.1, 636.0, 650.8, 653.7, 669.3, 677.2, 695.2, 715.8, 730.4, 813.4, 823.8, 909.7, 929.8, 958.7, 968.3, 998.5, 1005.3, 1038.6, 1041.1, 1093.7, 1107.5, 1150.9, 1176.8, 1235.3, 1244.8, 1316.6, 1331.0, 1338.4, 1366.6, 1395.6, 1400.2, 1407.2, 1413.6, 1425.6, 1433.5, 1453.9, 1542.2, 1590.6, 2165.1, 2955.3, 2968.4, 2976.9, 3005.3, 3017.9, 3049.9, 3077.8, 3088.3, 3113.9, 3136.3                                                                     |
| <b>TS(E8-E9)</b>                         | 520.7i, 40.7, 58.8, 69.1, 77.6, 94.2, 107.3, 124.6, 132.7, 174.9, 189.5, 198.8, 204.6, 208.1, 216.3, 236.6, 247.6, 309.7, 315.6, 339.6, 352.9, 357.5, 365.2, 365.5, 376.1, 443.6, 477.9, 499.4, 580.2, 604.5, 619.3, 630.6, 633.2, 643.0, 645.8, 665.6, 672.8, 678.1, 678.8, 714.8, 721.6, 774.4, 804.7, 840.8, 853.1, 890.8, 944.8, 968.8, 974.3, 982.4, 1025.7, 1041.5, 1061.3, 1089.7, 1131.6, 1138.2, 1146.4, 1208.6, 1291.8, 1310.4, 1329.4, 1340.7, 1347.9, 1391.5, 1405.8, 1406.5, 1411.3, 1413.8, 1437.8, 1501.5, 1718.8, 2939.0, 2961.8, 2967.9, 2992.2, 3007.6, 3028.4, 3030.3, 3076.2, 3077.9, 3096.5                                                                      |
| <b>E9</b>                                | 42.0, 52.3, 61.0, 67.7, 72.6, 85.5, 88.5, 105.0, 145.7, 184.0, 199.0, 209.5, 213.1, 217.1, 247.6, 255.4, 301.1, 307.0, 325.3, 338.1, 338.6, 362.7, 366.7, 385.5, 400.1, 448.4, 487.8, 507.2, 560.7, 595.9, 628.6, 634.9, 637.2, 642.0, 649.8, 656.0, 669.3, 675.7, 685.1, 690.1, 700.0, 708.6, 731.3, 822.4, 839.7, 934.2, 956.4, 987.7, 1010.2, 1040.8, 1048.8, 1067.5, 1090.7, 1103.2, 1137.1, 1150.7, 1184.7, 1258.5, 1283.7, 1300.6, 1329.2, 1330.7, 1359.7, 1389.0, 1405.8, 1412.2, 1430.0, 1450.1, 1468.1, 1755.4, 2657.8, 2713.8, 2910.0, 2925.5, 2973.2, 2987.0, 3020.7, 3054.7, 3079.1, 3092.0, 3093.1                                                                       |
| <b>TS(E9-10_pos2)</b>                    | 59.5i, 10.6, 39.7, 43.2, 53.4, 57.3, 68.4, 83.9, 105.7, 153.7, 161.6, 165.4, 196.0, 204.2, 207.5, 209.9, 239.6, 253.2, 266.8, 307.4, 318.0, 325.8, 344.1, 360.4, 366.3, 382.6, 393.8, 400.9, 436.6, 447.1, 565.2, 627.5, 634.1, 640.4, 651.6, 652.6, 662.5, 670.0, 678.5, 681.1, 696.4, 718.1, 724.7, 814.2, 887.3, 931.1, 935.3, 955.5, 972.3, 978.8, 984.3, 1032.8, 1049.8, 1058.1, 1066.8, 1092.1, 1136.2, 1271.2, 1310.1, 1324.4, 1344.1, 1356.0, 1359.1, 1387.6, 1408.1, 1421.0, 1430.8, 1449.4, 1633.5, 2239.3, 2706.2, 2942.2, 2948.6, 2971.7, 2993.9, 2997.6, 3046.1, 3051.3, 3055.8, 3058.4, 3141.2                                                                          |
| <b>TS(E9-10_pos1)</b>                    | 107.9i, 17.1, 32.3, 53.4, 56.8, 59.1, 77.6, 103.6, 129.8, 141.5, 173.1, 180.9, 202.2, 204.6, 213.1, 216.4, 234.3, 245.1, 262.9, 285.0, 313.8, 326.1, 353.3, 356.1, 361.9, 373.0, 379.1, 409.0, 428.2, 447.1, 559.2, 627.0, 635.0, 642.0, 643.3, 653.5, 657.5, 670.0, 677.7, 690.0, 705.6, 712.3, 720.2, 810.5, 894.6, 917.2, 926.6, 947.1, 962.7, 971.8, 975.4, 998.6, 1044.2, 1057.5, 1097.9, 1101.7, 1152.7, 1266.4, 1298.5, 1322.9, 1345.1, 1354.4, 1357.6, 1389.1, 1408.3, 1423.0, 1430.0, 1447.7, 1641.3, 2213.9, 2896.1, 2944.5, 2951.8, 2999.0, 2999.7, 3004.8, 3047.0, 3047.7, 3051.1, 3054.4, 3135.4                                                                         |
| <b>A2*Isobutene_pos2</b>                 | 30.9, 47.4, 47.6, 60.4, 67.5, 75.8, 81.4, 91.8, 127.3, 156.9, 166.6, 176.2, 176.7, 208.5, 209.2, 240.3, 246.6, 252.0, 266.0, 317.8, 334.0, 347.8, 358.8, 381.1, 417.6, 432.1, 435.3, 441.6, 532.5, 570.8, 585.6, 621.0, 633.3, 646.1, 647.3, 662.6, 673.2, 685.8, 690.5, 705.2, 716.8, 736.6, 738.1, 776.2, 815.8, 875.6, 934.3, 955.3, 965.6, 983.6, 1023.6, 1049.9, 1061.5, 1076.4, 1088.7, 1129.2, 1164.3, 1263.6, 1338.3, 1354.4, 1357.2, 1389.7, 1403.7, 1410.6, 1411.8, 1424.5, 1431.3, 1446.9, 1662.5, 1889.1, 2942.1, 2947.1, 2982.0, 2992.3, 2996.3, 3043.4, 3049.6, 3052.5, 3053.2, 3097.3, 3140.4                                                                          |
| <b>A2*Isobutene_pos1</b>                 | 19.3, 34.3, 48.4, 57.7, 66.8, 80.4, 86.1, 110.8, 137.0, 155.5, 162.0, 182.7, 190.6, 206.0, 215.0, 240.7, 247.0, 255.9, 269.4, 316.2, 333.9, 344.4, 355.6, 379.4, 416.6, 428.4, 434.7, 449.5, 541.9, 564.3, 586.6, 625.0, 634.8, 643.4, 647.3,                                                                                                                                                                                                                                                                                                                                                                                                                                         |

|                  |                                                                                                                                                                                                                                                                                                                                                                                                                                                                                                                                                               |
|------------------|---------------------------------------------------------------------------------------------------------------------------------------------------------------------------------------------------------------------------------------------------------------------------------------------------------------------------------------------------------------------------------------------------------------------------------------------------------------------------------------------------------------------------------------------------------------|
|                  | 663.5, 668.5, 684.7, 688.4, 698.1, 716.0, 736.2, 740.4, 760.3, 812.6, 875.3, 932.8, 959.8, 962.8, 982.4, 1016.7, 1049.2, 1061.4, 1079.5, 1095.6, 1132.0, 1167.9, 1262.6, 1330.4, 1352.3, 1355.4, 1387.1, 1391.2, 1404.3, 1410.3, 1425.5, 1430.4, 1446.3, 1660.8, 1865.7, 2937.7, 2950.2, 2990.3, 2993.4, 3001.7, 3042.8, 3049.7, 3051.5, 3062.3, 3116.7, 3134.1                                                                                                                                                                                               |
| <b>TS(C3-D5)</b> | 433.8i, 47.4, 53.5, 66.7, 75.9, 105.9, 107.1, 139.5, 160.9, 186.1, 205.6, 215.2, 240.3, 255.3, 284.0, 311.1, 326.0, 346.4, 354.9, 365.8, 381.2, 451.4, 494.6, 508.6, 533.4, 573.5, 607.4, 632.5, 634.4, 643.0, 658.3, 659.1, 670.8, 684.5, 695.6, 715.2, 731.3, 735.5, 799.2, 851.8, 947.4, 986.7, 1001.3, 1050.6, 1088.5, 1100.7, 1116.6, 1160.4, 1163.3, 1272.5, 1339.9, 1381.2, 1399.7, 1417.2, 1794.7, 2193.1, 2954.2, 2983.7, 3021.2, 3091.1                                                                                                             |
| <b>D5</b>        | 45.4, 52.3, 68.4, 70.7, 84.9, 113.9, 140.3, 151.9, 171.0, 204.9, 212.8, 218.8, 250.5, 258.8, 307.9, 322.6, 344.2, 352.2, 357.0, 363.0, 401.7, 422.0, 466.4, 490.8, 557.2, 575.3, 627.9, 636.8, 639.4, 643.4, 646.7, 654.6, 659.0, 672.3, 680.6, 688.2, 700.5, 726.7, 803.3, 949.2, 968.5, 992.7, 1028.8, 1078.2, 1089.2, 1099.2, 1104.4, 1148.3, 1177.2, 1307.2, 1324.5, 1390.6, 1399.4, 1816.9, 2199.2, 2383.7, 2915.7, 2961.7, 3028.5, 3095.7                                                                                                               |
| <b>D5*H2O</b>    | 13.6, 33.0, 45.9, 56.2, 64.8, 77.8, 79.8, 108.8, 130.2, 133.7, 150.8, 192.7, 212.3, 218.0, 240.0, 248.9, 254.2, 304.8, 308.9, 327.7, 338.6, 342.0, 363.3, 368.4, 392.8, 430.9, 438.9, 460.4, 509.3, 563.3, 594.4, 614.5, 631.7, 640.1, 640.3, 650.8, 654.2, 672.3, 676.2, 684.5, 692.2, 707.4, 718.7, 725.8, 865.1, 943.5, 1005.4, 1031.3, 1041.4, 1066.9, 1096.0, 1100.9, 1145.6, 1181.1, 1224.7, 1327.1, 1334.5, 1394.7, 1400.7, 1594.1, 1787.1, 2187.3, 2400.2, 2484.0, 2961.5, 3021.7, 3093.1, 3462.7, 3715.5                                             |
| <b>TS(D5-D7)</b> | 37.4i, 17.5, 37.6, 54.5, 72.2, 106.5, 157.2, 170.8, 187.2, 202.1, 210.0, 218.9, 257.7, 278.6, 306.2, 318.0, 341.9, 350.1, 361.4, 365.2, 396.3, 409.8, 460.6, 472.2, 546.1, 563.0, 634.4, 639.4, 646.1, 651.9, 657.7, 664.5, 671.4, 675.2, 684.8, 693.4, 714.9, 729.2, 798.4, 946.4, 985.2, 1006.1, 1027.1, 1038.6, 1075.4, 1095.1, 1121.3, 1167.8, 1203.3, 1333.1, 1353.8, 1402.5, 1403.0, 1798.6, 2191.6, 2513.1, 2959.3, 2996.2, 3023.5, 3089.6                                                                                                             |
| <b>D7</b>        | 52.1, 62.2, 78.1, 83.7, 107.6, 123.8, 139.0, 167.9, 184.2, 204.7, 233.6, 245.1, 253.3, 264.8, 316.2, 331.7, 341.2, 353.5, 358.3, 390.8, 434.4, 473.5, 523.0, 541.5, 569.6, 590.6, 641.7, 644.2, 651.9, 664.1, 667.5, 692.3, 698.7, 715.9, 728.0, 732.0, 740.7, 764.3, 796.8, 861.7, 960.5, 983.3, 1003.3, 1091.8, 1116.5, 1142.6, 1154.5, 1192.7, 1295.4, 1331.1, 1375.2, 1403.7, 1407.5, 1738.9, 1899.5, 2956.1, 2959.3, 3020.7, 3021.9, 3090.9                                                                                                              |
| <b>D7*H2O</b>    | 39.7, 62.6, 78.0, 87.1, 88.3, 101.3, 113.0, 125.1, 161.5, 179.6, 184.5, 191.5, 207.8, 233.7, 247.3, 254.7, 268.4, 297.9, 312.3, 334.5, 343.7, 356.2, 358.9, 388.4, 400.3, 409.3, 443.0, 484.7, 519.8, 539.9, 546.6, 590.4, 640.7, 642.8, 654.3, 665.0, 667.2, 691.5, 697.0, 710.9, 725.6, 730.0, 742.0, 772.7, 801.9, 869.7, 965.5, 982.5, 1000.8, 1087.9, 1118.6, 1136.7, 1153.4, 1175.7, 1305.8, 1329.7, 1378.7, 1401.7, 1411.4, 1587.4, 1729.0, 1908.8, 2896.7, 2959.9, 3024.3, 3030.3, 3092.7, 3636.6, 3734.2                                             |
| <b>TS(D7-C5)</b> | 66.8i, 25.9, 36.7, 52.5, 61.6, 79.4, 82.7, 101.6, 123.3, 150.1, 189.4, 196.2, 203.0, 214.9, 241.2, 248.4, 257.8, 305.9, 322.7, 342.8, 353.8, 357.2, 363.4, 384.8, 389.0, 396.3, 444.4, 481.0, 498.6, 562.4, 607.1, 628.6, 630.1, 637.4, 639.1, 644.9, 647.3, 662.4, 671.7, 678.7, 681.6, 691.9, 720.7, 729.0, 813.0, 941.8, 961.2, 998.6, 1049.3, 1072.0, 1089.2, 1091.3, 1136.6, 1151.1, 1183.5, 1327.0, 1357.5, 1391.8, 1399.7, 1543.6, 1770.6, 2189.9, 2855.0, 2952.2, 3007.8, 3035.6, 3091.5, 3485.2, 3670.7                                              |
| <b>TS(D5-C5)</b> | 61.1i, 25.5, 44.4, 53.5, 62.6, 75.4, 85.7, 108.3, 129.7, 152.1, 189.1, 194.6, 207.1, 213.3, 249.1, 258.7, 267.4, 305.2, 322.9, 329.7, 338.8, 359.8, 368.8, 377.8, 390.3, 406.3, 442.9, 473.0, 531.7, 564.1, 611.0, 624.9, 633.3, 638.0, 643.7, 647.0, 659.1, 662.8, 667.5, 676.5, 683.1, 706.8, 711.7, 757.7, 785.9, 935.9, 969.0, 1005.1, 1054.8, 1074.5, 1092.3, 1125.6, 1148.2, 1157.9, 1212.5, 1330.0, 1352.5, 1396.4, 1412.6, 1580.9, 1752.0, 2181.0, 2645.8, 2962.5, 3020.0, 3027.7, 3095.9, 3361.9, 3697.4                                             |
| <b>TS(D5-D8)</b> | 25.3i, 30.9, 35.1, 41.5, 52.9, 59.2, 70.9, 107.3, 122.6, 139.2, 141.8, 162.3, 194.0, 197.7, 211.6, 219.9, 249.0, 256.3, 307.2, 327.4, 335.6, 337.8, 362.1, 371.3, 371.9, 396.8, 414.8, 457.2, 497.0, 515.9, 559.0, 602.2, 622.9, 642.8, 645.2, 647.3, 652.6, 664.0, 668.1, 675.7, 689.3, 705.2, 719.9, 736.8, 793.3, 942.8, 994.9, 1010.2, 1019.7, 1058.6, 1101.4, 1102.8, 1138.6, 1159.9, 1242.0, 1305.6, 1329.2, 1402.8, 1405.6, 1589.4, 1781.5, 2112.3, 2261.3, 2962.1, 2984.1, 3024.6, 3091.9, 3550.0, 3755.1                                             |
| <b>D8</b>        | 34.8, 47.3, 57.8, 63.8, 83.1, 88.4, 105.8, 137.4, 142.7, 186.2, 190.9, 205.6, 217.0, 239.2, 251.9, 304.5, 319.0, 334.8, 340.1, 355.1, 360.5, 375.9, 385.7, 458.7, 511.0, 531.2, 541.1, 559.6, 592.7, 621.5, 630.6, 634.7, 651.7, 666.8, 671.5, 682.0, 688.3, 699.0, 708.7, 716.9, 800.5, 804.3, 818.8, 939.3, 947.1, 980.5, 1010.8, 1054.3, 1087.5, 1104.2, 1131.8, 1151.0, 1169.2, 1218.2, 1288.4, 1330.2, 1375.4, 1406.3, 1413.6, 1641.8, 1754.6, 1920.5, 2307.8, 2817.7, 2913.8, 2960.3, 3020.1, 3029.0, 3086.6                                            |
| <b>TS(D8-E1)</b> | 185.1i, 22.0, 38.2, 45.0, 55.3, 71.5, 92.8, 97.2, 133.1, 186.9, 195.6, 213.6, 244.8, 264.6, 266.9, 273.1, 302.0, 320.6, 322.3, 326.9, 331.1, 336.4, 360.7, 374.5, 381.1, 389.8, 398.3, 413.8, 417.9, 421.8, 458.2, 471.4, 525.5, 531.5, 618.6, 627.8, 634.7, 645.4, 659.9, 667.1, 676.0, 687.9, 701.0, 718.7, 787.3, 800.1, 852.1, 948.5, 970.8, 974.4, 979.2, 1003.8, 1017.8, 1031.0, 1034.6, 1078.7, 1106.5, 1113.9, 1132.8, 1189.7, 1282.1, 1330.3, 1360.4, 1402.7, 1415.2, 1604.2, 1758.7, 1955.9, 2719.5, 2835.4, 2961.8, 3017.7, 3025.2, 3086.9, 3257.6 |
| <b>TS(D5-D6)</b> | 281.3i, 27.0, 44.2, 46.7, 63.0, 73.8, 94.1, 124.7, 162.7, 190.7, 199.4, 214.6, 241.3, 242.4, 246.0, 309.9, 319.8, 337.3, 355.5, 362.3, 367.4, 381.2, 422.5, 434.1, 562.3, 603.9, 618.0, 625.4, 628.4, 639.3, 648.0, 653.0, 664.9, 672.7, 692.7, 704.7, 713.2, 758.8, 775.7, 889.8, 967.4, 998.6, 1062.0, 1087.9, 1116.7, 1131.6, 1175.2, 1179.9, 1256.5, 1316.3, 1338.4, 1381.6, 1397.1, 1657.4, 2240.3, 2675.1, 2910.5, 2963.7, 3009.4, 3085.5                                                                                                               |
| <b>D6</b>        | 30.3, 34.9, 58.5, 68.3, 84.3, 138.7, 164.7, 202.9, 207.1, 219.3, 245.8, 248.0, 272.8, 308.5, 319.7, 348.2, 354.9, 357.3, 394.5, 415.2, 439.5, 468.1, 474.7, 538.1, 563.1, 626.9, 632.6, 635.3, 644.5, 649.9, 652.0, 661.8, 669.3, 675.8, 687.9, 707.7, 722.2, 792.3, 820.2, 956.0, 969.6, 999.7, 1012.3, 1084.3, 1090.3, 1104.7, 1158.8, 1180.1, 1276.5, 1302.5, 1340.5, 1370.5, 1383.4, 1512.5, 2033.2, 2302.9, 2959.8, 3001.8, 3024.0, 3101.8                                                                                                               |
| <b>TS(D6-D4)</b> | 202.3i, 27.9, 41.9, 69.4, 86.2, 121.6, 153.2, 197.5, 206.9, 213.7, 240.5, 249.9, 293.6, 306.8, 310.4, 328.2, 348.4, 358.4, 383.1, 458.6, 482.5, 491.5, 527.5, 585.3, 609.9, 626.0, 630.1, 635.4, 640.6, 653.3, 656.2, 668.1, 679.9, 688.3, 706.9, 716.5, 729.7, 803.8, 838.3, 921.5, 955.0, 965.6, 1005.2, 1078.1, 1083.3, 1109.4, 1145.9, 1173.0, 1215.8, 1261.2, 1314.8, 1344.6, 1360.9, 1397.2, 1613.2, 1990.6, 2980.6, 3019.4, 3037.2, 3115.0                                                                                                             |

|                                       |                                                                                                                                                                                                                                                                                                                                                                                                                                                                                                                                                                                                                                                                                  |
|---------------------------------------|----------------------------------------------------------------------------------------------------------------------------------------------------------------------------------------------------------------------------------------------------------------------------------------------------------------------------------------------------------------------------------------------------------------------------------------------------------------------------------------------------------------------------------------------------------------------------------------------------------------------------------------------------------------------------------|
| <b>ZOH*Diketene</b>                   | 19.7, 25.4, 51.2, 55.0, 81.2, 124.6, 162.1, 199.5, 203.1, 216.6, 241.5, 249.3, 293.0, 318.7, 323.7, 335.5, 349.1, 355.5, 386.8, 433.7, 484.2, 517.7, 558.5, 613.3, 634.1, 638.4, 644.4, 660.7, 665.1, 667.6, 683.3, 690.9, 711.7, 721.7, 725.9, 737.6, 810.3, 835.7, 844.5, 860.5, 934.2, 948.8, 970.3, 1046.7, 1080.6, 1092.5, 1123.3, 1160.7, 1167.1, 1242.1, 1319.1, 1359.3, 1373.0, 1699.2, 1810.2, 2511.1, 3003.7, 3053.3, 3091.8, 3185.7                                                                                                                                                                                                                                   |
| <b>TS(C2-D1)</b>                      | 161.2i, 34.1, 41.2, 44.9, 54.0, 66.8, 76.9, 103.1, 138.0, 194.0, 199.8, 225.3, 233.1, 248.0, 267.8, 298.2, 317.1, 334.6, 347.4, 352.5, 385.6, 400.6, 414.8, 436.5, 456.7, 531.6, 542.1, 558.0, 609.7, 632.6, 637.7, 643.5, 647.7, 658.9, 670.1, 684.8, 690.8, 710.9, 712.3, 731.9, 738.7, 819.5, 827.9, 924.4, 965.6, 1094.8, 1109.8, 1124.4, 1133.0, 1162.5, 1301.0, 1343.7, 1368.0, 1971.2, 2179.4, 2818.4, 3073.2, 3075.9, 3164.0, 3215.7                                                                                                                                                                                                                                     |
| <b>D1</b>                             | 31.0, 45.6, 65.5, 77.1, 82.8, 111.6, 129.8, 157.9, 197.9, 213.3, 221.6, 240.2, 248.7, 307.2, 319.3, 344.4, 354.0, 355.1, 358.8, 386.0, 417.2, 439.7, 503.8, 555.7, 616.2, 623.6, 632.0, 634.8, 640.3, 647.3, 651.1, 666.0, 671.3, 677.1, 687.2, 714.6, 720.4, 803.2, 823.9, 848.9, 938.0, 950.4, 970.1, 1035.8, 1096.5, 1116.1, 1122.5, 1168.2, 1176.8, 1195.3, 1325.5, 1393.6, 1408.4, 1631.7, 2213.1, 2597.4, 2897.0, 2998.6, 3094.4, 3188.5                                                                                                                                                                                                                                   |
| <b>TS(D1-D4)</b>                      | 84.0i, 39.3, 48.4, 68.9, 77.3, 99.1, 107.8, 148.9, 196.5, 204.6, 235.8, 245.8, 262.4, 304.5, 312.8, 326.5, 339.6, 355.4, 359.0, 366.8, 404.7, 436.5, 456.9, 541.4, 603.2, 626.8, 632.4, 633.0, 639.9, 650.4, 654.4, 664.9, 680.3, 686.3, 692.5, 720.0, 726.5, 822.3, 847.7, 852.7, 894.9, 934.7, 947.3, 1098.5, 1112.4, 1114.2, 1122.0, 1169.6, 1195.3, 1229.6, 1329.4, 1350.2, 1387.0, 1696.5, 2105.7, 2224.5, 2911.3, 2999.4, 3101.0, 3196.2                                                                                                                                                                                                                                   |
| <b>ZOH*Diketene*H2O</b>               | 16.7, 40.3, 43.6, 60.3, 74.0, 83.1, 110.1, 125.6, 145.5, 166.9, 201.7, 208.7, 216.1, 240.0, 253.0, 289.2, 314.1, 318.9, 325.2, 338.5, 340.2, 374.1, 382.0, 390.9, 455.3, 507.5, 519.4, 560.9, 564.7, 622.7, 637.4, 648.5, 651.9, 664.4, 668.9, 669.3, 689.2, 690.7, 709.5, 712.1, 720.4, 737.8, 815.3, 832.0, 843.9, 849.7, 946.9, 972.1, 1005.2, 1052.9, 1079.0, 1107.1, 1119.8, 1171.7, 1200.8, 1248.0, 1334.3, 1363.1, 1385.9, 1607.5, 1685.3, 1791.7, 2299.8, 2857.2, 3034.7, 3100.2, 3194.3, 3554.1, 3720.5                                                                                                                                                                 |
| <b>TS(D4-D3)</b>                      | 216.5i, 21.6, 54.4, 66.1, 95.1, 116.4, 137.4, 165.2, 185.5, 205.4, 214.7, 224.3, 235.2, 240.9, 257.7, 285.2, 307.8, 327.1, 350.8, 351.8, 366.5, 393.5, 404.1, 430.3, 444.2, 463.3, 511.4, 554.6, 589.2, 598.5, 635.9, 642.4, 644.7, 650.9, 654.7, 661.9, 671.8, 688.5, 699.1, 706.8, 712.0, 735.5, 822.5, 836.1, 849.6, 882.9, 906.1, 909.3, 943.7, 1053.9, 1096.0, 1106.6, 1127.7, 1190.8, 1203.0, 1245.9, 1332.1, 1372.2, 1392.8, 1492.3, 1604.1, 1723.8, 2046.3, 2978.4, 3059.3, 3123.6, 3232.0, 3233.1, 3677.7                                                                                                                                                               |
| <b>ZOH*3-hydroxy-but-2-enoic-acid</b> | 29.4, 46.5, 54.4, 69.7, 75.9, 93.4, 109.5, 153.1, 200.0, 203.3, 218.0, 234.9, 242.1, 279.7, 312.6, 316.8, 345.0, 352.6, 360.6, 374.9, 382.0, 398.6, 430.6, 474.0, 538.0, 562.0, 588.1, 623.6, 638.3, 641.8, 650.9, 666.3, 674.7, 689.6, 690.6, 696.2, 704.7, 717.9, 721.0, 745.9, 823.3, 844.9, 858.6, 891.8, 917.9, 926.3, 952.6, 1035.2, 1040.7, 1076.4, 1149.5, 1154.3, 1211.5, 1250.5, 1270.2, 1293.4, 1374.1, 1381.8, 1393.6, 1408.2, 1627.8, 1684.7, 2164.9, 2935.7, 3004.0, 3077.4, 3107.0, 3201.8, 3656.9                                                                                                                                                                |
| <b>TS(D1-D2)</b>                      | 17.3i, 37.2, 68.9, 82.9, 96.6, 128.4, 168.8, 189.3, 213.3, 225.9, 234.0, 244.4, 263.5, 321.8, 325.9, 347.3, 364.3, 372.8, 400.5, 415.9, 438.9, 459.7, 476.8, 542.7, 585.6, 608.9, 637.4, 648.3, 654.5, 657.9, 660.4, 681.5, 685.3, 693.9, 698.6, 704.8, 738.5, 755.3, 805.9, 836.5, 878.6, 904.7, 920.1, 963.2, 977.7, 1043.8, 1113.7, 1130.2, 1242.8, 1261.4, 1322.6, 1382.1, 1394.0, 1669.3, 2060.0, 2950.4, 3009.9, 3103.9, 3198.6, 3290.5                                                                                                                                                                                                                                    |
| <b>D2</b>                             | 26.3, 45.5, 53.5, 79.3, 117.9, 134.0, 177.1, 206.8, 222.5, 232.5, 242.3, 247.1, 312.5, 332.5, 337.0, 356.3, 370.2, 384.2, 390.9, 413.5, 460.7, 472.2, 517.4, 536.8, 555.3, 606.9, 640.4, 651.5, 658.4, 664.3, 679.0, 685.8, 697.4, 709.1, 721.7, 733.3, 741.9, 750.5, 777.5, 801.9, 850.4, 915.7, 957.1, 969.6, 985.0, 1026.4, 1125.1, 1148.6, 1244.2, 1285.1, 1308.6, 1379.9, 1390.4, 1678.2, 1898.4, 2982.7, 3048.7, 3100.0, 3194.1, 3437.7                                                                                                                                                                                                                                    |
| <b>D2*H2O</b>                         | 49.4, 52.9, 79.4, 84.7, 95.8, 110.4, 134.3, 146.2, 157.8, 179.0, 190.0, 213.1, 213.6, 226.2, 247.0, 254.1, 309.9, 324.6, 330.9, 352.3, 368.4, 374.2, 391.8, 395.7, 437.2, 463.0, 480.6, 502.8, 521.2, 549.0, 604.9, 639.8, 645.2, 652.3, 657.8, 669.2, 684.7, 689.7, 691.1, 708.8, 724.4, 738.4, 745.4, 748.3, 785.9, 814.3, 853.2, 909.3, 956.5, 966.7, 1035.8, 1055.6, 1135.2, 1170.3, 1256.1, 1287.0, 1321.6, 1357.5, 1392.1, 1588.1, 1673.8, 1911.2, 2970.2, 3020.6, 3098.3, 3193.2, 3235.1, 3608.9, 3743.0                                                                                                                                                                  |
| <b>TS(D2-D3)</b>                      | 138.8i, 9.7, 37.6, 51.5, 62.9, 79.0, 93.0, 117.8, 156.4, 182.8, 210.7, 217.0, 221.2, 246.0, 251.0, 265.5, 314.6, 321.5, 349.4, 353.3, 364.9, 367.1, 393.9, 404.9, 411.7, 431.8, 463.4, 506.5, 557.8, 608.1, 634.3, 636.0, 641.8, 647.4, 649.3, 653.1, 668.0, 673.0, 681.8, 688.1, 694.3, 712.1, 723.5, 777.1, 820.5, 825.5, 875.7, 895.2, 953.0, 991.5, 1053.8, 1074.8, 1127.8, 1140.9, 1209.3, 1225.9, 1274.3, 1356.1, 1386.5, 1632.1, 1670.8, 2162.5, 2932.6, 3001.7, 3098.8, 3196.3, 3256.4, 3521.7, 3566.1                                                                                                                                                                   |
| <b>TS(D2-E1)</b>                      | 877.0i, 34.4, 36.0, 49.1, 55.5, 68.0, 90.8, 114.6, 159.8, 196.5, 206.8, 219.7, 242.6, 266.3, 273.3, 309.4, 323.8, 346.9, 360.5, 362.4, 378.1, 430.2, 491.7, 514.4, 548.9, 559.9, 577.5, 631.1, 638.2, 646.0, 652.1, 657.7, 660.6, 662.5, 675.0, 683.4, 687.8, 703.3, 716.2, 726.5, 741.2, 754.5, 858.6, 885.7, 905.1, 925.1, 938.2, 1006.0, 1053.9, 1074.6, 1096.9, 1148.6, 1154.7, 1168.7, 1216.3, 1259.6, 1307.8, 1355.6, 1395.0, 1416.7, 1430.2, 1578.3, 1768.6, 3019.7, 3024.7, 3085.2, 3140.2, 3294.2, 3578.9                                                                                                                                                               |
| <b>TS(DAA_dehydration)</b>            | 64.9i, 34.6, 46.1, 54.1, 57.8, 68.1, 70.8, 79.8, 118.4, 121.1, 131.9, 166.7, 183.2, 185.7, 193.4, 210.1, 215.5, 219.8, 248.9, 268.7, 311.8, 316.3, 326.7, 335.5, 342.1, 361.0, 368.0, 392.2, 396.6, 408.5, 439.9, 466.5, 492.4, 544.4, 563.9, 624.2, 626.5, 632.8, 637.7, 641.8, 644.8, 664.6, 666.5, 668.5, 676.1, 701.0, 710.2, 717.7, 790.1, 837.1, 871.0, 919.1, 938.8, 972.4, 999.8, 1031.8, 1043.1, 1071.1, 1075.5, 1091.2, 1102.1, 1149.1, 1194.3, 1272.3, 1288.3, 1310.7, 1325.2, 1344.3, 1372.5, 1386.6, 1396.1, 1406.3, 1432.0, 1444.5, 1460.2, 1610.6, 1784.4, 2911.3, 2929.7, 2962.9, 2972.0, 2986.6, 3002.7, 3036.9, 3074.4, 3079.7, 3085.9, 3096.7, 3338.8, 3709.1 |
| <b>(101)</b>                          |                                                                                                                                                                                                                                                                                                                                                                                                                                                                                                                                                                                                                                                                                  |
| <b>Z(101)</b>                         | 182.7, 211.2, 215.0, 223.9, 285.6, 324.4, 348.8, 352.5, 380.7, 598.9, 642.4, 659.3, 667.4, 688.0, 690.3, 705.3, 761.1, 770.8, 1045.2, 1055.3, 1078.9                                                                                                                                                                                                                                                                                                                                                                                                                                                                                                                             |
| <b>Z*AcOH</b>                         | 51.0, 67.9, 85.1, 102.1, 155.8, 162.6, 183.1, 208.8, 231.8, 251.6, 293.9, 334.2, 342.9, 355.1, 362.9, 423.4, 528.7, 589.6, 595.2, 634.0, 640.1, 651.1, 664.4, 679.1, 681.1, 687.5, 702.2, 728.5, 922.5, 972.4, 1010.7, 1026.6, 1074.9, 1088.7, 1100.5, 1334.2, 1364.4, 1402.9, 1416.3, 1491.8, 1622.3, 2303.5, 2989.4, 3055.7, 3106.0                                                                                                                                                                                                                                                                                                                                            |

|                        |                                                                                                                                                                                                                                                                                                                                                                                                                                                                                                                                                                                                                     |
|------------------------|---------------------------------------------------------------------------------------------------------------------------------------------------------------------------------------------------------------------------------------------------------------------------------------------------------------------------------------------------------------------------------------------------------------------------------------------------------------------------------------------------------------------------------------------------------------------------------------------------------------------|
| <b>Z*Ketene</b>        | 19.2, 61.1, 109.4, 119.7, 169.7, 193.4, 211.7, 226.9, 238.8, 290.7, 323.7, 338.1, 349.0, 361.9, 383.6, 412.7, 521.0, 598.7, 631.6, 634.6, 646.4, 657.1, 669.5, 684.7, 690.6, 739.4, 756.6, 904.5, 1051.1, 1081.4, 1116.1, 1139.5, 1328.8, 2140.7, 3072.9, 3177.7                                                                                                                                                                                                                                                                                                                                                    |
| <b>Z*Diketene</b>      | 40.0, 41.0, 56.6, 89.1, 103.2, 118.2, 178.3, 206.0, 215.9, 228.6, 271.9, 306.2, 331.6, 342.3, 347.4, 361.0, 390.2, 433.6, 470.5, 520.0, 594.0, 627.4, 628.5, 642.9, 657.6, 670.7, 680.8, 683.0, 688.9, 721.7, 731.2, 747.1, 837.2, 879.6, 912.1, 927.4, 970.9, 1057.4, 1084.1, 1087.0, 1109.8, 1171.7, 1182.6, 1356.6, 1374.0, 1731.9, 1963.9, 3002.8, 3054.4, 3093.8, 3190.7                                                                                                                                                                                                                                       |
| <b>Z*E1</b>            | 43.4, 50.6, 78.7, 114.4, 119.1, 135.6, 146.8, 150.5, 164.4, 192.5, 208.7, 233.0, 240.2, 294.0, 322.8, 337.6, 343.4, 365.1, 398.8, 420.2, 463.2, 503.4, 559.7, 574.1, 614.4, 631.8, 651.9, 669.3, 676.9, 681.5, 693.7, 702.2, 717.3, 738.7, 814.9, 857.1, 903.7, 965.1, 991.1, 1009.7, 1050.4, 1067.6, 1111.0, 1120.8, 1200.4, 1216.7, 1292.3, 1337.5, 1373.8, 1391.8, 1407.8, 1425.2, 1631.8, 1745.9, 2773.2, 2958.6, 3009.3, 3015.6, 3084.7, 3096.1                                                                                                                                                                |
| <b>Z*Acetone</b>       | 40.4, 56.8, 77.8, 110.8, 132.6, 150.1, 160.2, 179.2, 211.5, 214.8, 234.3, 283.2, 330.9, 339.3, 350.2, 363.9, 379.1, 439.8, 500.3, 577.5, 605.2, 627.8, 643.7, 652.3, 668.3, 677.6, 685.7, 718.5, 733.7, 822.0, 839.4, 934.4, 1042.4, 1062.9, 1066.2, 1074.7, 1111.7, 1247.7, 1323.0, 1333.6, 1394.1, 1399.9, 1409.9, 1432.1, 1637.1, 2950.2, 2964.2, 3005.5, 3020.5, 3086.7, 3097.8                                                                                                                                                                                                                                 |
| <b>Z*Mesityl_oxide</b> | 12.3, 53.2, 55.2, 75.5, 91.3, 111.3, 115.9, 127.2, 148.8, 177.3, 196.3, 207.7, 213.4, 234.0, 239.1, 290.4, 330.6, 343.2, 350.8, 354.7, 370.2, 379.5, 443.4, 472.5, 507.9, 592.6, 600.7, 619.2, 624.1, 640.7, 646.0, 660.8, 668.5, 681.0, 699.3, 728.9, 803.0, 829.5, 904.6, 935.5, 963.0, 987.7, 992.2, 1039.0, 1048.0, 1074.0, 1081.4, 1121.9, 1175.3, 1245.0, 1320.7, 1323.5, 1339.5, 1368.5, 1392.5, 1396.3, 1405.2, 1414.3, 1426.4, 1443.9, 1512.9, 1588.8, 2948.9, 2955.0, 2959.4, 3002.8, 3023.7, 3030.3, 3064.0, 3069.5, 3084.6, 3091.9                                                                      |
| <b>TS(C2-D1)</b>       | 131.1i, 26.2, 57.2, 63.7, 74.7, 105.3, 125.4, 134.5, 172.2, 202.4, 212.4, 230.5, 237.1, 291.4, 325.6, 331.1, 340.6, 356.9, 369.1, 387.1, 424.8, 444.0, 452.6, 535.9, 541.9, 595.3, 634.1, 649.5, 656.8, 663.7, 677.0, 683.1, 693.2, 715.1, 742.1, 765.2, 892.8, 946.9, 1044.7, 1073.9, 1102.4, 1126.3, 1144.9, 1339.6, 1346.7, 2043.4, 2153.8, 2926.8, 3070.4, 3146.8, 3219.4                                                                                                                                                                                                                                       |
| <b>TS(D1-D3)</b>       | 55.2i, 27.8, 53.0, 62.0, 82.3, 95.6, 109.7, 131.0, 141.6, 192.6, 214.3, 218.4, 232.7, 239.0, 286.7, 311.0, 330.2, 342.8, 355.4, 373.4, 388.6, 400.5, 430.7, 491.2, 500.5, 522.6, 544.9, 594.6, 626.7, 632.0, 641.5, 652.3, 661.6, 667.3, 679.9, 695.4, 710.8, 715.8, 752.9, 810.9, 837.0, 952.0, 997.1, 1024.4, 1067.4, 1085.8, 1122.1, 1159.8, 1217.2, 1326.0, 1402.5, 1569.9, 1644.3, 2199.3, 2752.3, 3020.1, 3090.9, 3187.5, 3510.5, 3680.5                                                                                                                                                                      |
| <b>TS(D4-D3)</b>       | 152.5i, 24.5, 44.6, 65.5, 82.8, 111.4, 125.6, 176.7, 195.8, 212.9, 225.2, 239.5, 248.6, 258.8, 298.8, 335.0, 337.7, 358.1, 361.6, 402.2, 412.4, 429.8, 455.6, 460.8, 494.0, 582.1, 602.0, 627.4, 646.0, 650.8, 658.8, 672.0, 674.9, 685.1, 701.9, 708.6, 725.0, 833.1, 835.6, 861.4, 898.0, 915.1, 973.3, 1039.1, 1066.5, 1103.4, 1116.2, 1205.4, 1239.2, 1370.2, 1381.1, 1603.9, 1696.5, 2066.1, 2975.5, 3060.4, 3092.0, 3127.2, 3187.3, 3654.0                                                                                                                                                                    |
| <b>TS(A1-E1)</b>       | 246.1i, 33.0, 59.9, 76.8, 88.1, 137.5, 148.9, 180.1, 218.9, 232.3, 235.4, 238.6, 265.0, 294.5, 324.2, 332.0, 345.6, 351.2, 366.8, 387.3, 421.7, 440.9, 490.5, 549.2, 571.0, 628.0, 633.8, 648.6, 650.3, 664.6, 670.6, 677.9, 695.0, 697.8, 721.1, 733.8, 777.6, 838.5, 967.1, 975.1, 1019.2, 1047.7, 1067.6, 1077.3, 1095.9, 1141.0, 1173.3, 1198.6, 1340.6, 1344.8, 1411.1, 1421.6, 1435.8, 2172.9, 2636.6, 2979.5, 3006.0, 3062.8, 3073.8, 3238.0                                                                                                                                                                 |
| <b>TS(B1-B2)</b>       | 266.1i, 33.3, 45.8, 74.5, 102.1, 114.2, 123.7, 127.3, 155.2, 187.5, 213.8, 240.4, 246.1, 261.5, 266.3, 285.8, 320.2, 334.3, 349.0, 353.8, 387.9, 419.6, 458.4, 488.8, 498.8, 517.9, 541.1, 574.7, 591.9, 625.1, 639.8, 647.4, 662.6, 671.1, 676.2, 687.2, 699.0, 711.1, 731.7, 794.1, 852.2, 943.3, 946.8, 959.2, 981.1, 986.7, 1025.5, 1040.5, 1080.0, 1104.3, 1138.1, 1185.6, 1269.4, 1318.8, 1342.3, 1415.6, 1425.7, 1438.5, 1449.8, 1521.1, 1578.6, 2372.2, 2980.2, 3041.4, 3058.8, 3092.2, 3128.6, 3568.9, 3692.0                                                                                              |
| <b>TS(E1-E2)</b>       | 95.6i, 33.9, 47.4, 67.6, 81.5, 87.7, 107.9, 126.5, 145.7, 151.4, 176.2, 200.7, 214.7, 226.4, 241.3, 277.2, 311.1, 326.0, 357.3, 377.3, 388.1, 473.3, 495.4, 527.5, 534.4, 583.0, 590.7, 624.7, 641.2, 651.2, 671.3, 683.1, 687.4, 702.6, 719.7, 742.1, 749.0, 811.5, 825.3, 883.0, 975.7, 1016.0, 1062.2, 1067.5, 1122.0, 1250.3, 1261.5, 1316.3, 1364.0, 1388.2, 1414.6, 1430.4, 1586.8, 2245.9, 2967.5, 3027.4, 3069.4, 3085.4, 3181.5, 3193.4                                                                                                                                                                    |
| <b>TS(E4-E6*)</b>      | 170.7i, 41.1, 54.4, 58.0, 94.4, 109.9, 116.8, 132.0, 156.2, 169.7, 180.3, 212.4, 220.0, 230.2, 231.9, 254.6, 263.7, 281.7, 288.2, 317.1, 347.8, 356.7, 364.1, 398.4, 422.0, 457.0, 477.6, 515.4, 555.9, 564.2, 620.5, 626.8, 637.3, 653.3, 662.2, 667.3, 688.7, 700.0, 715.7, 778.4, 813.6, 869.7, 885.8, 902.8, 931.2, 953.1, 976.8, 988.9, 1012.6, 1028.7, 1043.4, 1051.6, 1111.1, 1143.2, 1228.3, 1283.3, 1343.8, 1344.4, 1352.3, 1390.0, 1398.6, 1409.2, 1415.8, 1421.3, 1430.3, 1440.9, 1465.0, 1488.9, 1564.4, 2839.5, 2952.0, 2961.8, 2962.1, 3031.0, 3033.4, 3039.3, 3072.6, 3074.9, 3085.5, 3087.8, 3182.2 |
| <b>TS(E7*-E8)</b>      | 569.8i, 26.6, 50.4, 69.4, 74.4, 81.7, 90.7, 105.0, 148.1, 165.0, 180.8, 190.2, 196.5, 207.4, 214.7, 217.9, 236.2, 243.8, 282.7, 295.7, 327.9, 344.4, 346.1, 358.1, 365.7, 424.6, 442.6, 450.6, 508.8, 566.3, 612.5, 615.6, 619.3, 631.8, 658.3, 670.7, 680.5, 693.3, 701.2, 742.1, 758.0, 802.8, 814.8, 852.5, 881.6, 893.4, 942.9, 951.2, 989.7, 990.7, 1029.9, 1039.3, 1114.9, 1141.3, 1149.8, 1195.1, 1229.8, 1303.9, 1318.5, 1329.9, 1335.1, 1354.2, 1378.3, 1403.3, 1411.2, 1412.8, 1420.3, 1447.6, 1495.3, 1692.5, 2926.2, 2955.9, 2961.1, 2995.0, 3023.9, 3025.8, 3040.7, 3071.4, 3084.5, 3108.3, 3746.1     |
| <b>TS(E7-E8)</b>       | 201.0i, 32.1, 56.9, 59.0, 70.9, 104.6, 108.2, 125.4, 156.4, 188.0, 202.6, 212.9, 218.4, 220.6, 230.4, 265.7, 272.5, 295.4, 318.9, 330.2, 334.5, 339.6, 363.7, 371.3, 383.5, 431.6, 451.3, 506.4, 553.0, 586.4, 601.4, 623.1, 627.2, 639.7, 647.3, 661.2, 669.5, 684.8, 713.7, 725.6, 763.6, 778.5, 828.0, 887.0, 901.1, 939.1, 978.9, 980.7, 1011.7, 1022.7, 1056.0, 1072.6, 1084.5, 1125.2, 1150.5, 1218.6, 1282.8, 1341.6, 1344.3, 1359.5, 1363.2, 1389.7, 1411.3, 1418.8, 1419.9, 1425.6, 1447.0, 1451.1, 1614.5, 2963.3, 2966.5, 2967.4, 3025.9, 3028.1, 3039.6, 3071.0, 3073.9, 3088.8, 3109.3, 3388.0, 3705.6 |
| <b>TS(E8*-E10)</b>     | 1087.1i, 18.8, 35.6, 60.8, 86.8, 115.0, 124.6, 136.8, 171.1, 175.6, 201.6, 214.6, 215.6, 222.9, 239.1, 255.0, 284.5, 295.8, 319.1, 330.2, 348.5, 355.0, 371.6, 387.7, 411.3, 475.5, 489.5, 517.5, 559.9, 578.4, 620.7, 635.7, 639.9, 648.0, 663.5, 667.8, 672.7, 692.4, 707.8, 725.7, 750.5, 807.8, 846.4, 876.4, 894.5, 957.8, 982.6, 1009.1, 1030.2, 1045.6, 1056.3, 1093.3, 1127.8, 1132.7, 1164.6, 1183.1, 1234.9, 1312.6, 1326.0, 1339.0, 1343.7, 1373.1, 1387.2, 1395.5,                                                                                                                                      |

|  |                                                                                                                                        |
|--|----------------------------------------------------------------------------------------------------------------------------------------|
|  | 1416.5, 1425.4, 1425.5, 1439.7, 1546.8, 1779.7, 2922.4, 2955.8, 2973.2, 2978.6, 3010.1, 3014.0, 3014.0, 3060.9, 3067.9, 3073.4, 3077.9 |
|--|----------------------------------------------------------------------------------------------------------------------------------------|
